# Supplementary material for: A novel convenient approach towards pyrrolo[1,2-b]pyridazines through a domino coupling–isomerization–condensation reaction
Source: Royal Society of Chemistry journal article supplement (doi:10.1039/c3ob40157j), 2013-01-01

# A novel convenient approach towards pyrrolo[1,2-*b*]pyridazines through a domino coupling-isomerization-condensation reaction

Meng Wang, Cun Tan, Qian He, Yuyuan Xie and Chunhao Yang\*

State Key Laboratory of Drug Research, Shanghai Institute of Materia Medica, Chinese Academy of Sciences, 555 Zuchongzhi Road, Shanghai, 201203, P.R. China. Fax: 86-21-50806770; Tel: 86-21-50806770; E-mail: [chyang@simm.ac.cn](mailto:chyang@simm.ac.cn)

## Table of contents:

|                                                             |    |
|-------------------------------------------------------------|----|
| General Methods and Materials                               | 1  |
| Experimental Procedures and Characterizations               | 1  |
| <sup>1</sup> H and <sup>13</sup> C NMR Spectra of Compounds | 12 |

### *General methods:*

Unless otherwise noted, all solvents and other reagents are commercially available and used without further purification. Propargyl alcohols **2** were prepared according to reported literature procedures<sup>1</sup> by addition of ethynyl magnesium bromide to the corresponding aldehydes. Low- and high-resolution mass spectra (ESI) were measured on an Agilent 6110 mass spectrometer and an Orbitrap mass spectrometer, respectively. <sup>1</sup>H and <sup>13</sup>C NMR spectra were determined on Bruker AM-300, Bruker AM-400, Bruker AM-500 instruments using tetramethylsilane as internal reference. Data are presented as follows: chemical shift, multiplicity (s = singlet, br s = broad singlet, d = doublet, br d = broad doublet, t = triplet, m = multiplet), *J* = coupling constant in hertz (Hz). Microwave reaction was performed with a CEM microwave reactor. Melting points were measured by Büchi 510 melting point apparatus without further corrected. Silica gel 60H (200-300 mesh) manufactured by Qingdao Haiyang Chemical Group Co. (China) was used for general chromatography.

### *Experimental Procedures and Characterizations:*

#### **Preparation of methyl 5-bromo-1*H*-pyrrole-2-carboxylate:<sup>2</sup>**

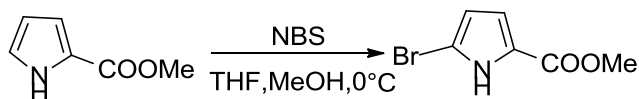

To a solution of methyl pyrrole-2-carboxylate (750 mg, 6 mmol) in THF (60 mL) and MeOH (30 mL) at 0°C was added NBS (1.07 g, 6 mmol) in four portions in 2 h. The resulting solution was stirred for another 2 h at 0°C. Then the solvent was removed in vacuum and the crude product was purified via silica gel flash column chromatography (petroleum ether / EtOAc = 40/1) to give a white floppy solid (550 mg, 45%): <sup>1</sup>H NMR (CDCl<sub>3</sub>, 300 MHz): δ 9.66 (br s, 1H), 6.82 (t, *J* = 3.2 Hz, 1H), 6.21 (dd, *J* = 3.0, 3.0 Hz, 1H), 3.87 (s, 3H); ESI *m/z* 204.0 [M+1]<sup>+</sup>.

#### Preparation of methyl 1-amino-5-bromo-1*H*-pyrrole-2-carboxylate:

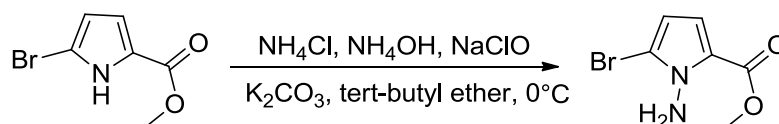

Preparation according to the literature,<sup>3</sup> K<sub>2</sub>CO<sub>3</sub> was used here to replace NaOH. To a mixture of 5-bromo-1*H*-pyrrole-2-carboxylate (612 mg, 3 mmol), NH<sub>4</sub>Cl (963 mg, 18 mmol), K<sub>2</sub>CO<sub>3</sub> (2.07 g, 15 mmol) and aqueous solution of NH<sub>4</sub>OH (3 mL) in tert-butyl ether (50 mL), an aqueous solution of 8% NaClO (30 mL) was added slowly at 0°C over 20 mins. The resulting reaction mixture was stirred at room temperature for 2 h. The organic layer is separated, washed with saturated aqueous Na<sub>2</sub>S<sub>2</sub>O<sub>3</sub> (20 mL), dried over anhydrous Na<sub>2</sub>SO<sub>4</sub>. The solvent was removed in vacuum and the crude product was purified via silica gel flash column chromatography (petroleum ether / EtOAc = 40/1) to give a light brown solid (460 mg, 70%): <sup>1</sup>H NMR (CDCl<sub>3</sub>, 300 MHz): δ 6.82 (d, *J* = 4.5 Hz, 1H), 6.11 (d, *J* = 4.5 Hz, 1H), 5.65 (s, 2H), 3.82 (s, 3H). <sup>13</sup>C NMR (126 MHz, CDCl<sub>3</sub>): δ 161.40, 120.73, 115.54, 111.26, 108.62, 51.36; ESI *m/z* 219.0 [M+1]<sup>+</sup>.

#### General Procedure for Preparation of pyrrolo[1,2-*b*]pyridazines 3a-t:

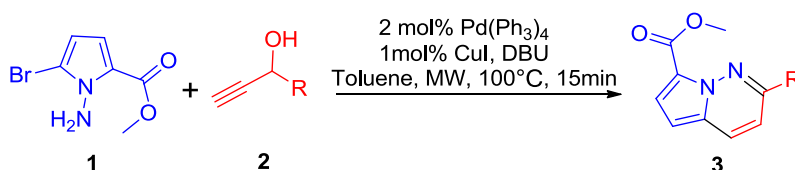

To the mixture of 1-amino-5-bromo-1*H*-pyrrole-2-carboxylate (0.4 mmol), arylpropargyl alcohol (0.8 mmol), Pd(PPh<sub>3</sub>)<sub>4</sub> (9.2 mg, 0.008 mmol), CuI (0.8 mg, 0.004 mmol) in anhydrous Toulene (2 mL) was added DBU (304mg, 2 mmol) under nitrogen. Then, the reaction was performed in a microwave reactor at 100 °C. When the reaction was complete, the solvent was removed in vacuum, and the crude product was eluted on silica gel with petroleum ether/ethyl acetate to give the corresponding product.

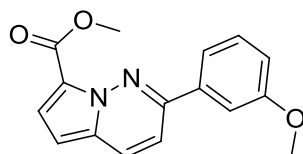

**Methyl 2-(3-methoxyphenyl)pyrrolo[1,2-*b*]pyridazine-7-carboxylate 3a** : following general procedure, this compound was purified by flash column chromatography on silica gel using petroleum ether : EtOAc (30:1) in a 91% yield as a brown oil. <sup>1</sup>H NMR (500 MHz, CDCl<sub>3</sub>) δ 7.88 (d, *J* = 9.4 Hz, 1H), 7.66 (t, *J* = 1.9 Hz, 1H), 7.64 (d, *J* = 7.8 Hz, 1H), 7.55 (d, *J* = 4.7 Hz, 1H), 7.41 (t, *J* = 7.9 Hz, 1H), 7.27 (d, *J* = 9.5 Hz, 1H), 7.01 (dd, *J* = 8.2, 2.5 Hz, 1H), 6.54 (d, *J* = 4.7 Hz, 1H), 3.97 (s, 3H), 3.91 (s, 3H). <sup>13</sup>C NMR (126 MHz, CDCl<sub>3</sub>) δ 160.17, 160.09, 150.81, 137.43, 130.28, 129.93, 127.24, 120.79, 119.42, 119.06, 115.70, 112.17, 111.95, 100.79, 55.38, 51.36. HRMS (ESI) calcd. for C<sub>16</sub>H<sub>15</sub>N<sub>2</sub>O<sub>3</sub> [M+H]<sup>+</sup> : 283.1083. Found: 283.1072.

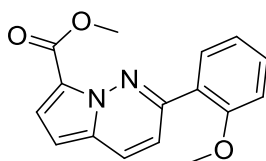

**Methyl 2-(2-methoxyphenyl)pyrrolo[1,2-*b*]pyridazine-7-carboxylate 3b** : following general procedure, this compound was purified by flash column chromatography on silica gel using petroleum ether : EtOAc (30:1) in a 46% yield as a brown oil. <sup>1</sup>H NMR (500 MHz, CDCl<sub>3</sub>) δ 7.89 (d, *J* = 7.6 Hz, 1H), 7.78 (d, *J* = 9.3 Hz, 1H), 7.53 (d, *J* = 4.6 Hz, 1H), 7.43 (t, *J* = 7.8 Hz, 1H), 7.35 (d, *J* = 9.3 Hz, 1H), 7.11 (t, *J* = 7.5 Hz, 1H), 7.00 (d, *J* = 8.3 Hz, 1H), 6.51 (d, *J* = 4.7 Hz, 1H), 3.93 (s, 3H), 3.86 (s, 3H). <sup>13</sup>C NMR (126 MHz, CDCl<sub>3</sub>) δ 160.16, 157.50, 151.11, 131.23, 130.92, 130.31, 125.92, 125.44, 121.38, 120.39, 118.72, 116.57, 111.45, 100.23, 55.67,

51.26. HRMS (ESI) calcd. for  $C_{16}H_{15}N_2O_3$   $[M+H]^+$  : 283.1083. Found: 283.1071.

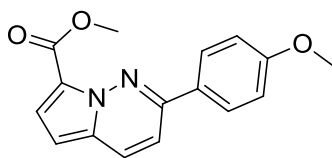

**Methyl 2-(4-methoxyphenyl)pyrrolo[1,2-*b*]pyridazine-7-carboxylate 3c** : following general procedure, this compound was purified by flash column chromatography on silica gel using petroleum ether : EtOAc (30:1) in a 87% yield as a brown oil.  $^1H$  NMR (300 MHz,  $CDCl_3$ )  $\delta$  8.04 (d,  $J = 8.8$  Hz, 1H), 7.84 (d,  $J = 9.4$  Hz, 1H), 7.51 (d,  $J = 4.7$  Hz, 1H), 7.24 (d,  $J = 8.8$  Hz, 1H), 7.01 (d,  $J = 8.8$  Hz, 1H), 6.51 (d,  $J = 4.7$  Hz, 1H), 3.96 (s, 3H), 3.87 (s, 3H).  $^{13}C$  NMR (126 MHz,  $CDCl_3$ )  $\delta$  161.09, 160.23, 150.69, 130.17, 128.51, 128.33, 127.16, 120.43, 118.85, 114.34, 111.71, 100.73, 55.41, 51.36. HRMS (ESI) calcd. for  $C_{16}H_{15}N_2O_3$   $[M+H]^+$  : 283.1083. Found: 283.1073.

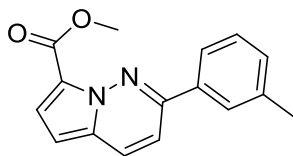

**Methyl 2-(3-methylphenyl)pyrrolo[1,2-*b*]pyridazine-7-carboxylate 3d** : following general procedure, this compound was purified by flash column chromatography on silica gel using petroleum ether : EtOAc (30:1) in a 84% yield as a brown oil.  $^1H$  NMR (400 MHz,  $CDCl_3$ )  $\delta$  7.97 – 7.81 (m, 3H), 7.56 (d,  $J = 4.7$  Hz, 1H), 7.40 (t,  $J = 7.6$  Hz, 1H), 7.29 (d,  $J = 9.3$  Hz, 2H), 6.55 (d,  $J = 4.7$  Hz, 1H), 3.98 (s, 3H), 2.47 (s, 2H).  $^{13}C$  NMR (101 MHz,  $CDCl_3$ )  $\delta$  160.21, 151.28, 138.64, 135.98, 130.64, 130.35, 128.86, 127.58, 127.24, 124.19, 120.71, 118.93, 112.16, 100.77, 51.41, 21.64. HRMS (ESI) calcd. for  $C_{16}H_{15}N_2O_2$   $[M+H]^+$  : 267.1134. Found: 267.1124.

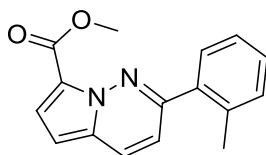

**Methyl 2-(2-methylphenyl)pyrrolo[1,2-*b*]pyridazine-7-carboxylate 3e** : following general procedure, this compound was purified by flash column chromatography on silica gel using petroleum ether : EtOAc (30:1) in a 29% yield as a brown oil.  $^1H$  NMR (500 MHz,  $CDCl_3$ )  $\delta$  7.86 (d,  $J = 9.2$  Hz, 1H), 7.56 (d,  $J = 4.7$  Hz, 1H), 7.49 (d,

$J = 7.4$  Hz, 1H), 7.38 – 7.26 (m, 3H), 6.97 (d,  $J = 9.2$  Hz, 1H), 6.55 (d,  $J = 4.7$  Hz, 1H), 3.92 (s, 3H), 2.55 (s, 3H).  $^{13}\text{C}$  NMR (126 MHz,  $\text{CDCl}_3$ )  $\delta$  160.13, 153.26, 136.85, 136.48, 131.23, 129.87, 129.08, 126.81, 126.05, 120.63, 118.99, 115.28, 100.67, 51.37, 20.83. HRMS (ESI) calcd. for  $\text{C}_{16}\text{H}_{15}\text{N}_2\text{O}_2$   $[\text{M}+\text{H}]^+$  : 267.1134. Found: 267.1124.

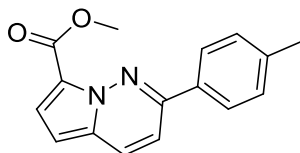

**Methyl 2-(4-methylphenyl)pyrrolo[1,2-*b*]pyridazine-7-carboxylate 3f** : following general procedure, this compound was purified by flash column chromatography on silica gel using petroleum ether : EtOAc (30:1) in a 80% yield as a light brown solid (M. p. = 84–86 °C).  $^1\text{H}$  NMR (400 MHz,  $\text{CDCl}_3$ )  $\delta$  8.00 (d,  $J = 8.2$  Hz, 2H), 7.87 (d,  $J = 9.4$  Hz, 1H), 7.54 (d,  $J = 4.7$  Hz, 1H), 7.31 (d,  $J = 8.0$  Hz, 2H), 7.28 (d,  $J = 9.4$  Hz, 1H), 6.53 (d,  $J = 4.7$  Hz, 3H), 3.98 (s, 3H), 2.43 (s, 3H).  $^{13}\text{C}$  NMR (101 MHz,  $\text{CDCl}_3$ )  $\delta$  160.23, 151.01, 140.00, 133.15, 130.30, 129.68, 127.20, 126.82, 120.58, 118.88, 111.89, 100.74, 51.38, 21.40. HRMS (ESI) calcd. for  $\text{C}_{16}\text{H}_{15}\text{N}_2\text{O}_2$   $[\text{M}+\text{H}]^+$  : 267.1134. Found: 267.1124.

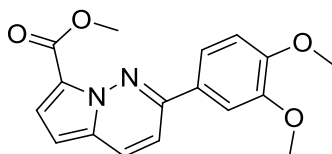

**Methyl 2-(3,4-dimethoxyphenyl)pyrrolo[1,2-*b*]pyridazine-7-carboxylate 3g** : following general procedure, this compound was purified by flash column chromatography on silica gel using petroleum ether : EtOAc (5:1) in a 77% yield as a white solid (M. p. = 149–151 °C).  $^1\text{H}$  NMR (400 MHz,  $\text{CDCl}_3$ )  $\delta$  7.82 (d,  $J = 9.4$  Hz, 1H), 7.78 (d,  $J = 1.9$  Hz, 1H), 7.53 (dd,  $J = 8.4, 2.0$  Hz, 1H), 7.51 (d,  $J = 4.7$  Hz, 1H), 7.24 (d,  $J = 9.4$  Hz, 1H), 6.94 (d,  $J = 8.4$  Hz, 1H), 6.50 (d,  $J = 4.7$  Hz, 1H), 4.02 (s, 3H), 3.95 (s, 3H), 3.93 (s, 3H).  $^{13}\text{C}$  NMR (101 MHz,  $\text{CDCl}_3$ )  $\delta$  160.27, 150.68, 150.57, 149.39, 130.13, 128.79, 127.13, 120.57, 119.78, 118.93, 111.65, 110.94, 109.55, 100.81, 55.99, 51.37. HRMS (ESI) calcd. for  $\text{C}_{17}\text{H}_{17}\text{N}_2\text{O}_4$   $[\text{M}+\text{H}]^+$  : 313.1188. Found: 313.1176.

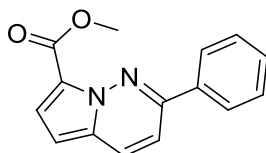

**Methyl 2-phenylpyrrolo[1,2-*b*]pyridazine-7-carboxylate 3h** : following general procedure, this compound was purified by flash column chromatography on silica gel using petroleum ether : EtOAc (30:1) in a 91% yield as a brown oil.  $^1\text{H}$  NMR (400 MHz,  $\text{CDCl}_3$ )  $\delta$  8.09 (d,  $J = 7.0$  Hz, 2H), 7.89 (d,  $J = 9.4$  Hz, 1H), 7.55 (d,  $J = 4.7$  Hz, 1H), 7.53 – 7.43 (m, 4H), 7.29 (d,  $J = 9.4$  Hz, 1H), 6.54 (d,  $J = 4.7$  Hz, 1H), 3.97 (s, 3H).  $^{13}\text{C}$  NMR (126 MHz,  $\text{CDCl}_3$ )  $\delta$  160.16, 151.02, 136.00, 130.28, 129.81, 128.94, 127.29, 126.95, 120.71, 118.97, 111.90, 100.78, 51.37. HRMS (ESI) calcd. for  $\text{C}_{15}\text{H}_{13}\text{N}_2\text{O}_2$   $[\text{M}+\text{H}]^+$  : 253.0977. Found: 253.0968.

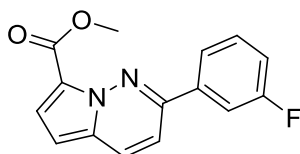

**Methyl 2-(3-fluorophenyl)pyrrolo[1,2-*b*]pyridazine-7-carboxylate 3i** : following general procedure, this compound was purified by flash column chromatography on silica gel using petroleum ether : EtOAc (30:1) in a 91% yield as a light brown solid (M. p. = 90–92 °C).  $^1\text{H}$  NMR (500 MHz,  $\text{CDCl}_3$ )  $\delta$  7.93 (d,  $J = 9.4$  Hz, 1H), 7.88 (d,  $J = 7.8$  Hz, 1H), 7.83 (dt,  $J = 10.0, 2.1$  Hz, 1H), 7.59 (d,  $J = 4.7$  Hz, 1H), 7.49 (td,  $J = 8.0, 5.9$  Hz, 1H), 7.28 (d,  $J = 4.3$  Hz, 1H), 7.18 (td,  $J = 8.1, 2.3$  Hz, 1H), 6.59 (d,  $J = 4.7$  Hz, 1H), 4.00 (s, 3H).  $^{13}\text{C}$  NMR (126 MHz,  $\text{CDCl}_3$ )  $\delta$  163.25 (d,  $^1 J_{\text{C-F}} = 246.1$  Hz), 160.10, 149.79 (d,  $^4 J_{\text{C-F}} = 2.8$  Hz), 138.28 (d,  $^3 J_{\text{C-F}} = 7.8$  Hz), 130.51 (d,  $^3 J_{\text{C-F}} = 8.1$  Hz), 130.29, 127.53, 122.59 (d,  $^4 J_{\text{C-F}} = 3.0$  Hz), 121.02, 119.12, 116.75 (d,  $^2 J_{\text{C-F}} = 21.3$  Hz), 113.94 (d,  $^2 J_{\text{C-F}} = 23.3$  Hz), 111.56, 101.03, 51.46. HRMS (ESI) calcd. for  $\text{C}_{15}\text{H}_{12}\text{FN}_2\text{O}_2$   $[\text{M}+\text{H}]^+$  : 271.0883. Found: 271.0874.

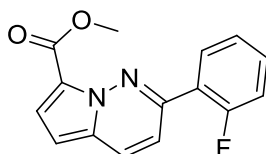

**Methyl 2-(2-fluorophenyl)pyrrolo[1,2-*b*]pyridazine-7-carboxylate 3j** : following general procedure, this compound was purified by flash column chromatography on silica gel using petroleum ether : EtOAc (30:1) in a 85% yield as a yellow solid (M. p.

= 103–104 °C).  $^1\text{H}$  NMR (400 MHz,  $\text{CDCl}_3$ )  $\delta$  8.10 (td,  $J = 7.8, 1.7$  Hz, 1H), 7.86 (d,  $J = 9.4$  Hz, 1H), 7.56 (d,  $J = 4.7$  Hz, 1H), 7.48 – 7.39 (m, 1H), 7.36 – 7.25 (m, 2H), 7.21 – 7.12 (m, 1H), 6.55 (d,  $J = 4.7$  Hz, 1H), 3.94 (s, 3H).  $^{13}\text{C}$  NMR (101 MHz,  $\text{CDCl}_3$ )  $\delta$  160.85 (d,  $^1J_{\text{C-F}} = 250.4$  Hz), 160.08, 148.27, 131.43 (d,  $^3J_{\text{C-F}} = 8.6$  Hz), 130.95 (d,  $^4J_{\text{C-F}} = 2.4$  Hz), 130.27, 126.69, 124.92 (d,  $^4J_{\text{C-F}} = 3.4$  Hz), 124.37 (d,  $^2J_{\text{C-F}} = 11.2$  Hz), 120.87, 118.92, 116.31 (d,  $^2J_{\text{C-F}} = 22.5$  Hz), 115.12 (d,  $^3J_{\text{C-F}} = 9.2$  Hz), 100.72, 51.39. HRMS (ESI) calcd. for  $\text{C}_{15}\text{H}_{12}\text{FN}_2\text{O}_2$   $[\text{M}+\text{H}]^+$  : 271.0883. Found: 271.0874.

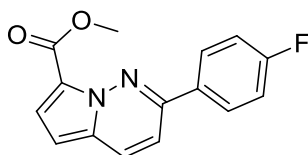

**Methyl 2-(4-fluorophenyl)pyrrolo[1,2-*b*]pyridazine-7-carboxylate 3k** : following general procedure, this compound was purified by flash column chromatography on silica gel using petroleum ether : EtOAc (30:1) in a 84% yield as a yellow solid (M. p. = 108–110 °C).  $^1\text{H}$  NMR (500 MHz,  $\text{CDCl}_3$ )  $\delta$  8.13 – 8.04 (m, 2H), 7.90 (d,  $J = 9.4$  Hz, 1H), 7.56 (d,  $J = 4.7$  Hz, 1H), 7.25 (d,  $J = 9.4$  Hz, 1H), 7.20 (ddd,  $J = 8.7, 6.9, 2.1$  Hz, 2H), 6.56 (d,  $J = 4.7$  Hz, 1H), 3.99 (s, 3H).  $^{13}\text{C}$  NMR (126 MHz,  $\text{CDCl}_3$ )  $\delta$  163.96 (d,  $^1J_{\text{C-F}} = 250.7$  Hz), 160.12, 150.03, 132.16 (d,  $^4J_{\text{C-F}} = 2.5$  Hz), 130.15, 128.88 (d,  $^3J_{\text{C-F}} = 8.9$  Hz), 127.44, 120.75, 118.97, 115.99 (d,  $^2J_{\text{C-F}} = 21.4$  Hz), 111.55, 100.93, 51.41. HRMS (ESI) calcd. for  $\text{C}_{15}\text{H}_{12}\text{FN}_2\text{O}_2$   $[\text{M}+\text{H}]^+$  : 271.0883. Found: 271.0872.

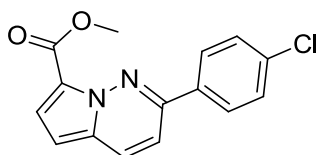

**Methyl 2-(4-chlorophenyl)pyrrolo[1,2-*b*]pyridazine-7-carboxylate 3l** : following general procedure, this compound was purified by flash column chromatography on silica gel using petroleum ether : EtOAc (30:1) in a 83% yield as a yellow solid (M. p. = 122–124 °C).  $^1\text{H}$  NMR (400 MHz,  $\text{CDCl}_3$ )  $\delta$  8.01 (d,  $J = 8.5$  Hz, 2H), 7.87 (d,  $J = 9.4$  Hz, 1H), 7.54 (d,  $J = 4.7$  Hz, 1H), 7.45 (d,  $J = 8.5$  Hz, 2H), 7.22 (d,  $J = 9.4$  Hz, 1H), 6.54 (d,  $J = 4.7$  Hz, 1H), 3.95 (s, 3H).  $^{13}\text{C}$  NMR (101 MHz,  $\text{CDCl}_3$ )  $\delta$  160.09, 149.83, 136.01, 134.43, 130.21, 129.17, 128.18, 127.48, 120.89, 119.02, 111.40,

101.01, 51.42. HRMS (ESI) calcd. for  $C_{15}H_{12}ClN_2O_2$   $[M+H]^+$  : 287.0587. Found: 287.0581.

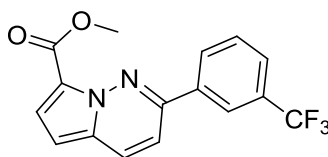

**Methyl 2-(trifluoromethyl)pyrrolo[1,2-*b*]pyridazine-7-carboxylate 3m** : following general procedure, this compound was purified by flash column chromatography on silica gel using petroleum ether : EtOAc (30:1) in a 44% yield as a yellow solid (M. p. = 115–117 °C).  $^1H$  NMR (300 MHz,  $CDCl_3$ )  $\delta$  8.33 (d,  $J = 7.8$  Hz, 1H), 8.27 (s, 1H), 7.92 (d,  $J = 9.4$  Hz, 1H), 7.71 (d,  $J = 7.7$  Hz, 1H), 7.62 (t,  $J = 7.9$  Hz, 1H), 7.58 (d,  $J = 4.7$  Hz, 1H), 7.28 (d,  $J = 9.4$  Hz, 1H), 6.57 (d,  $J = 4.7$  Hz, 1H), 3.97 (s, 3H).  $^{13}C$  NMR (126 MHz,  $CDCl_3$ )  $\delta$  160.12, 149.52, 136.86, 131.33(q,  $^2 J_{C-F} = 32.6$  Hz), 130.28, 130.22, 129.59, 127.72, 126.41 (q,  $^3 J_{C-F} = 3.4$  Hz), 124.00 (q,  $^1 J_{C-F} = 272.5$  Hz), 123.63 (q,  $^3 J_{C-F} = 3.5$  Hz), 121.18, 119.26, 111.31, 101.18, 51.48. HRMS (ESI) calcd. for  $C_{16}H_{12}F_3N_2O_2$   $[M+H]^+$  : 321.0851. Found: 287.0841.

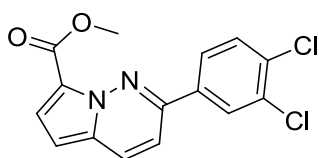

**Methyl 2-(3,4-dichlorophenyl)pyrrolo[1,2-*b*]pyridazine-7-carboxylate 3n** : following general procedure, this compound was purified by flash column chromatography on silica gel using petroleum ether : EtOAc (30:1) in a 25% yield as a yellow solid (M. p. = 118–120 °C).  $^1H$  NMR (500 MHz,  $CDCl_3$ )  $\delta$  8.16 (d,  $J = 2.1$  Hz, 1H), 7.97 (dd,  $J = 8.4, 2.2$  Hz, 1H), 7.93 (d,  $J = 9.4$  Hz, 1H), 7.63 – 7.50 (m, 2H), 7.23 (d,  $J = 9.4$  Hz, 1H), 6.59 (d,  $J = 4.7$  Hz, 1H), 3.99 (s, 3H).  $^{13}C$  NMR (126 MHz,  $CDCl_3$ )  $\delta$  160.03, 148.69, 135.93, 134.08, 133.23, 130.94, 130.19, 128.65, 127.68, 126.09, 121.18, 119.17, 111.08, 101.23, 51.49. HRMS (ESI) calcd. for  $C_{15}H_{11}Cl_2N_2O_2$   $[M+H]^+$  : 321.0198. Found: 287.0185.

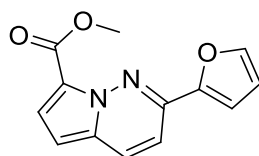

**Methyl 2-(furan-2-yl)pyrrolo[1,2-*b*]pyridazine-7-carboxylate 3o** : following



general procedure, this compound was purified by flash column chromatography on silica gel using petroleum ether : EtOAc (30:1) in a 75% yield as a brown solid (M. p. = 103–105 °C).  $^1\text{H}$  NMR (400 MHz,  $\text{CDCl}_3$ )  $\delta$  7.83 (d,  $J = 9.4$  Hz, 1H), 7.59 (dd,  $J = 1.7, 0.7$  Hz, 1H), 7.51 (d,  $J = 4.7$  Hz, 1H), 7.23 (d,  $J = 9.4$  Hz, 1H), 7.15 (dd,  $J = 3.4, 0.7$  Hz, 1H), 6.55 (dd,  $J = 3.4, 1.8$  Hz, 1H), 6.51 (d,  $J = 4.7$  Hz, 1H), 3.95 (s, 3H).  $^{13}\text{C}$  NMR (126 MHz,  $\text{CDCl}_3$ )  $\delta$  159.59, 149.72, 143.78, 143.47, 129.74, 126.80, 120.17, 118.60, 111.75, 110.14, 109.71, 100.76, 50.99. HRMS (ESI) calcd. for  $\text{C}_{13}\text{H}_{11}\text{N}_2\text{O}_3$   $[\text{M}+\text{H}]^+$  : 243.0770. Found: 243.0763.

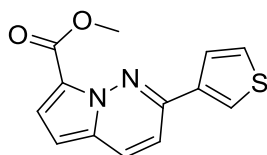

**Methyl 2-(thiophen-3-yl)pyrrolo[1,2-*b*]pyridazine-7-carboxylate 3p** : following general procedure, this compound was purified by flash column chromatography on silica gel using petroleum ether : EtOAc (30:1) in a 90% yield as a brown solid (M. p. = 97–99 °C).  $^1\text{H}$  NMR (500 MHz,  $\text{CDCl}_3$ )  $\delta$  7.94 – 7.85 (m, 1H), 7.85 – 7.71 (m, 2H), 7.50 (d,  $J = 4.7$  Hz, 1H), 7.44 – 7.33 (m, 1H), 7.15 (d,  $J = 9.3$  Hz, 1H), 6.49 (d,  $J = 4.7$  Hz, 1H), 3.95 (s, 3H).  $^{13}\text{C}$  NMR (126 MHz,  $\text{CDCl}_3$ )  $\delta$  160.15, 147.39, 138.58, 130.16, 127.24, 126.67, 126.25, 124.47, 120.57, 118.94, 112.06, 101.00, 51.36. HRMS (ESI) calcd. for  $\text{C}_{13}\text{H}_{11}\text{N}_2\text{O}_2\text{S}$   $[\text{M}+\text{H}]^+$  : 259.0541. Found: 259.0530.

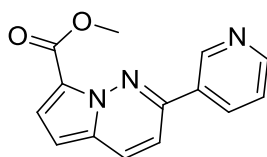

**Methyl 2-(pyridin-3-yl)pyrrolo[1,2-*b*]pyridazine-7-carboxylate 3q** : following general procedure, this compound was purified by flash column chromatography on silica gel using EtOAc in a 79% yield as a yellow solid (M. p. = 127–129 °C).  $^1\text{H}$  NMR (400 MHz,  $\text{CDCl}_3$ )  $\delta$  9.21 (s, 1H), 8.69 (s, 1H), 8.45 (dt,  $J = 8.0, 1.8$  Hz, 1H), 7.93 (d,  $J = 9.4$  Hz, 1H), 7.56 (d,  $J = 4.7$  Hz, 1H), 7.43 (dd,  $J = 8.0, 4.8$  Hz, 1H), 7.27 (d,  $J = 9.4$  Hz, 1H), 6.57 (d,  $J = 4.7$  Hz, 1H), 3.95 (s, 3H).  $^{13}\text{C}$  NMR (101 MHz,  $\text{CDCl}_3$ )  $\delta$  160.07, 150.77, 148.59, 148.02, 134.50, 131.89, 130.23, 127.80, 123.88, 121.10, 119.24, 111.15, 101.26, 51.48. HRMS (ESI) calcd. for  $\text{C}_{14}\text{H}_{12}\text{N}_3\text{O}_2$   $[\text{M}+\text{H}]^+$  :

254.0930. Found: 254.0920.

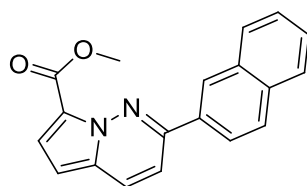

**Methyl 2-(naphthalen-2-yl)pyrrolo[1,2-*b*]pyridazine-7-carboxylate 3r** : following general procedure, this compound was purified by flash column chromatography on silica gel using petroleum ether : EtOAc (30:1) in a 96% yield as a light yellow solid (M. p. = 118–120 °C). <sup>1</sup>H NMR (500 MHz, CDCl<sub>3</sub>) δ 8.46 (s, 1H), 8.36 (d, *J* = 8.6 Hz, 1H), 8.01 – 7.95 (m, 2H), 7.94 – 7.88 (m, 2H), 7.58 (d, *J* = 4.7 Hz, 1H), 7.57 – 7.51 (m, 2H), 7.45 (d, *J* = 9.4 Hz, 1H), 6.56 (d, *J* = 4.6 Hz, 1H), 4.01 (s, 3H). <sup>13</sup>C NMR (126 MHz, CDCl<sub>3</sub>) δ 160.14, 150.73, 133.96, 133.28, 133.19, 130.24, 128.78, 128.65, 127.70, 127.21, 126.90, 126.51, 126.41, 124.17, 120.72, 118.96, 111.89, 100.82, 51.35. HRMS (ESI) calcd. for C<sub>19</sub>H<sub>15</sub>N<sub>2</sub>O<sub>2</sub> [M+H]<sup>+</sup> : 303.1134. Found: 303.1122.

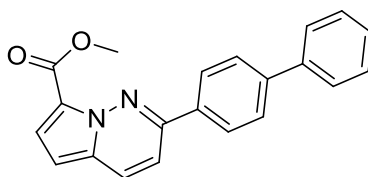

**Methyl 2-([1,1'-biphenyl]-4-yl)pyrrolo[1,2-*b*]pyridazine-7-carboxylate 3s** : following general procedure, this compound was purified by flash column chromatography on silica gel using petroleum ether : EtOAc (30:1) in a 74% yield as a yellow solid (M. p. = 168–170 °C). <sup>1</sup>H NMR (300 MHz, CDCl<sub>3</sub>) δ 8.17 (d, *J* = 8.3 Hz, 2H), 7.89 (d, *J* = 9.4 Hz, 1H), 7.73 (d, *J* = 8.2 Hz, 2H), 7.70 – 7.62 (m, 2H), 7.56 (d, *J* = 4.7 Hz, 1H), 7.53 – 7.44 (m, 2H), 7.43 – 7.36 (m, 1H), 7.33 (d, *J* = 9.4 Hz, 1H), 6.55 (d, *J* = 4.7 Hz, 1H), 3.98 (s, 3H). <sup>13</sup>C NMR (101 MHz, CDCl<sub>3</sub>) δ 160.19, 150.63, 142.56, 140.35, 134.87, 130.32, 128.90, 127.74, 127.64, 127.36, 127.32, 127.14, 120.76, 119.00, 111.81, 100.87, 51.42. HRMS (ESI) calcd. for C<sub>21</sub>H<sub>17</sub>N<sub>2</sub>O<sub>2</sub> [M+H]<sup>+</sup> : 329.1290. Found: 329.1277.

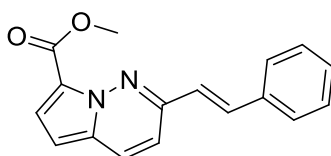

**(E)-methyl 2-styrylpyrrolo[1,2-b]pyridazine-7-carboxylate 3t** : following general procedure, this compound was purified by flash column chromatography on silica gel using petroleum ether : EtOAc (30:1) in a 11% yield as a yellow solid (M. p. = 129–131 °C). <sup>1</sup>H NMR (400 MHz, CDCl<sub>3</sub>) δ 7.46 – 7.38 (m, 2H), 7.36 – 7.31 (m, 2H), 7.30 – 7.26 (m, 1H), 6.81 (dd, *J* = 15.8, 1.4 Hz, 1H), 6.31 (dd, *J* = 15.8, 5.9 Hz, 1H), 5.15 – 5.02 (m, 1H), 2.65 (d, *J* = 2.2 Hz, 1H), 2.19 – 2.10 (m, 1H). <sup>13</sup>C NMR (126 MHz, CDCl<sub>3</sub>) δ 160.16, 150.57, 136.03, 134.39, 130.46, 128.86, 127.23, 126.78, 125.84, 120.59, 118.87, 111.29, 101.13, 51.44. HRMS (ESI) calcd. for C<sub>17</sub>H<sub>15</sub>N<sub>2</sub>O<sub>2</sub> [M+H]<sup>+</sup> : 279.1134. Found: 279.1123.

#### References:

- S1: N. Krause, D. Seebach, *Chem. Ber.* 1987, **120**, 1845.  
S2: B. M. Trost and G. Dong, *Chem.-Eur. J.*, 2009, **15**, 6910.  
S3: US2012077814A1. 2012, pp. 25.

## $^1\text{H}$ and $^{13}\text{C}$ NMR Spectra of Compounds

### Compound 3a

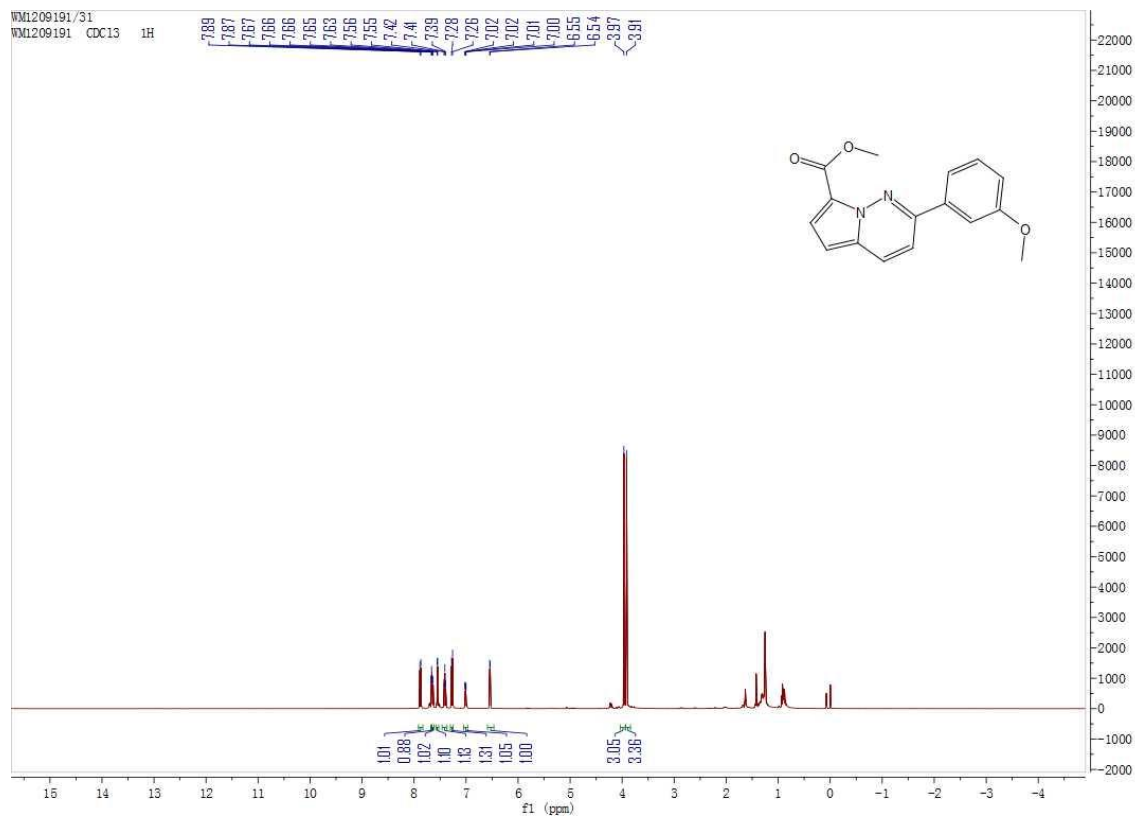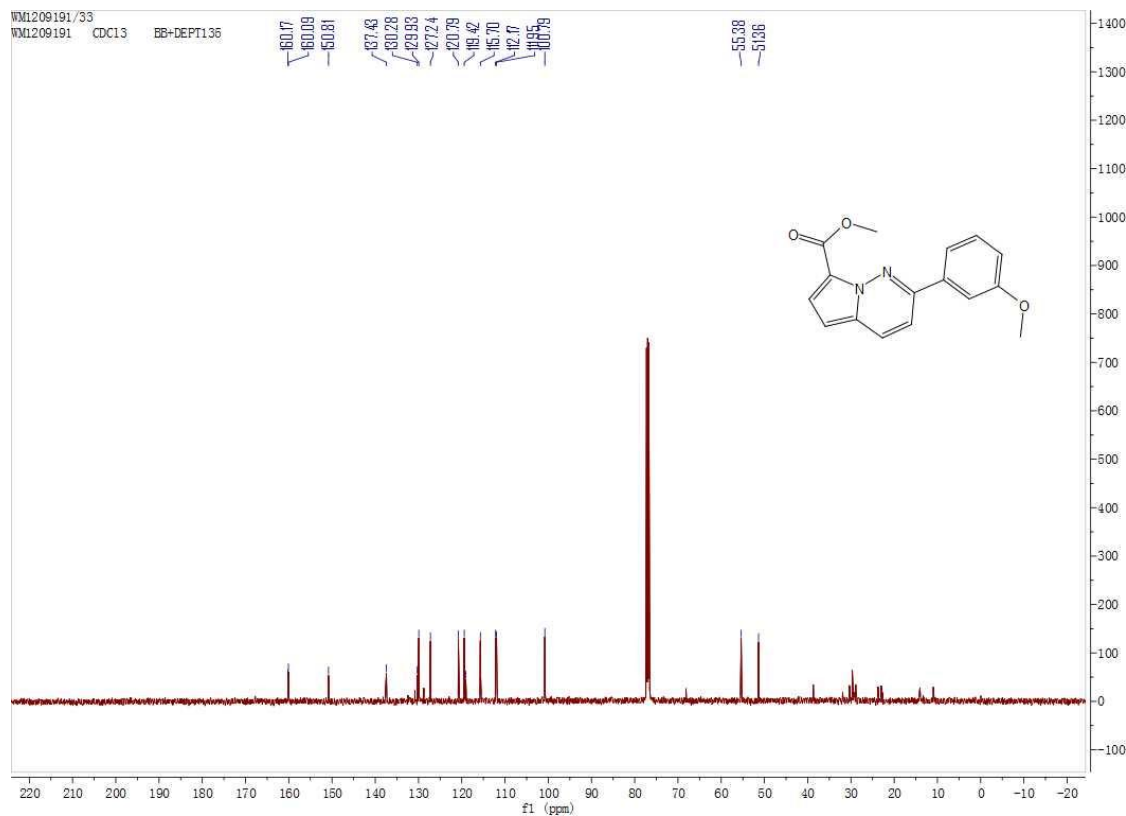

## Compound 3b

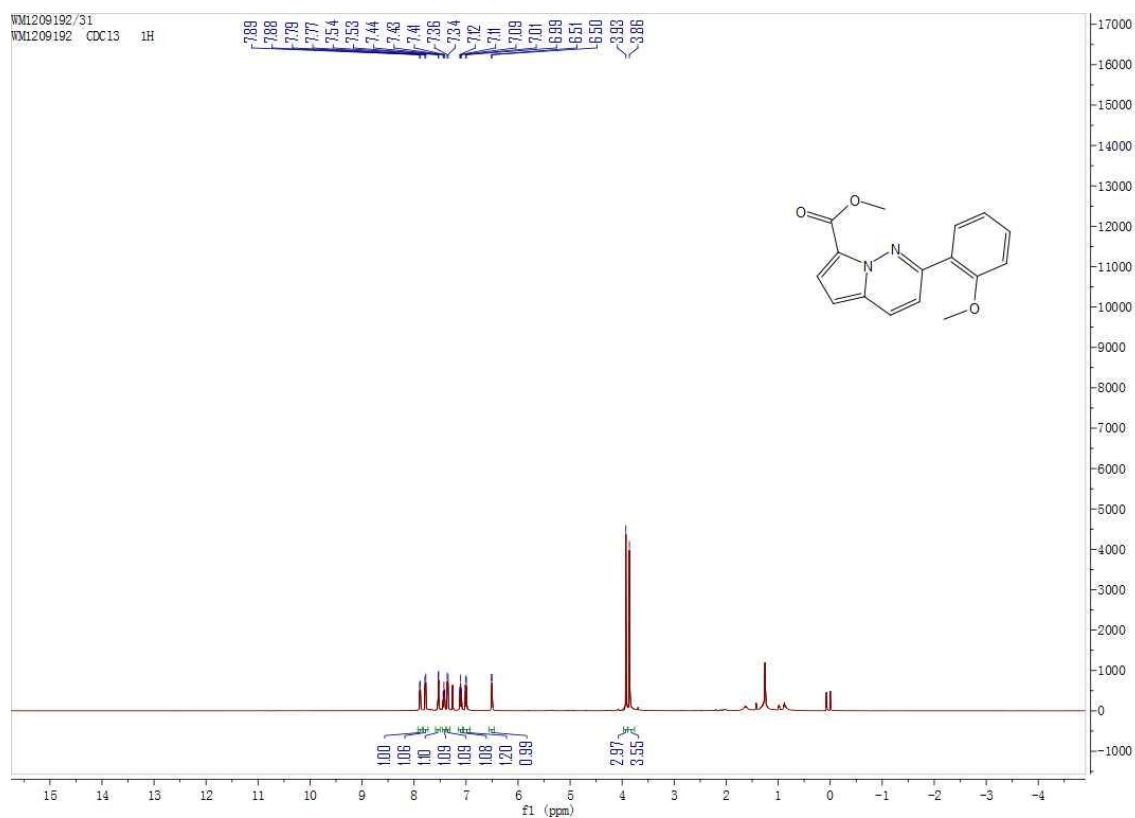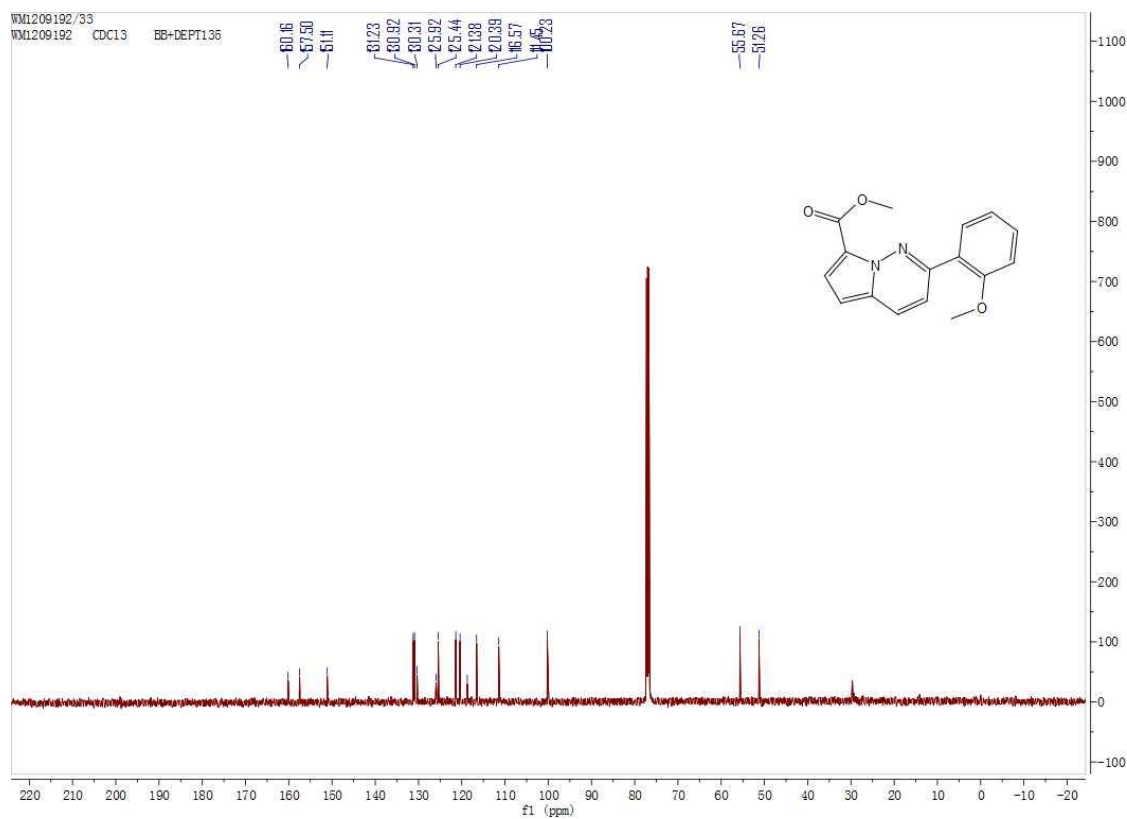

### Compound 3c

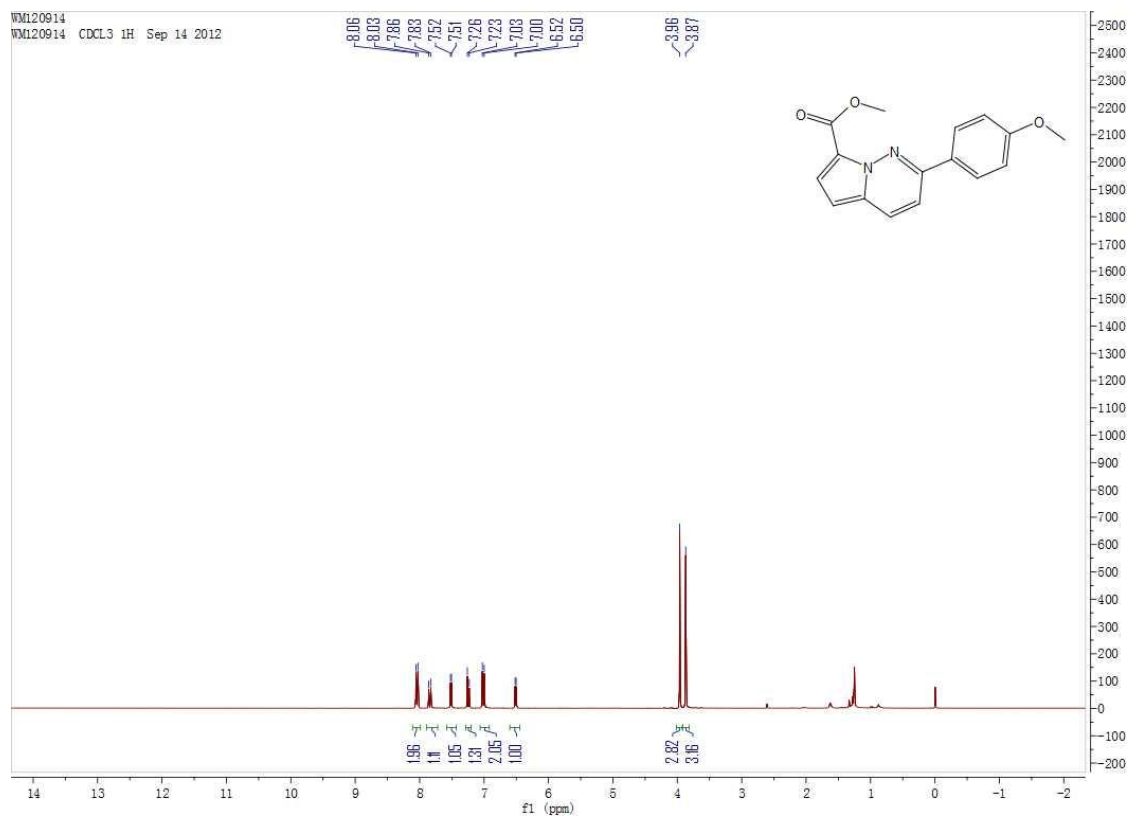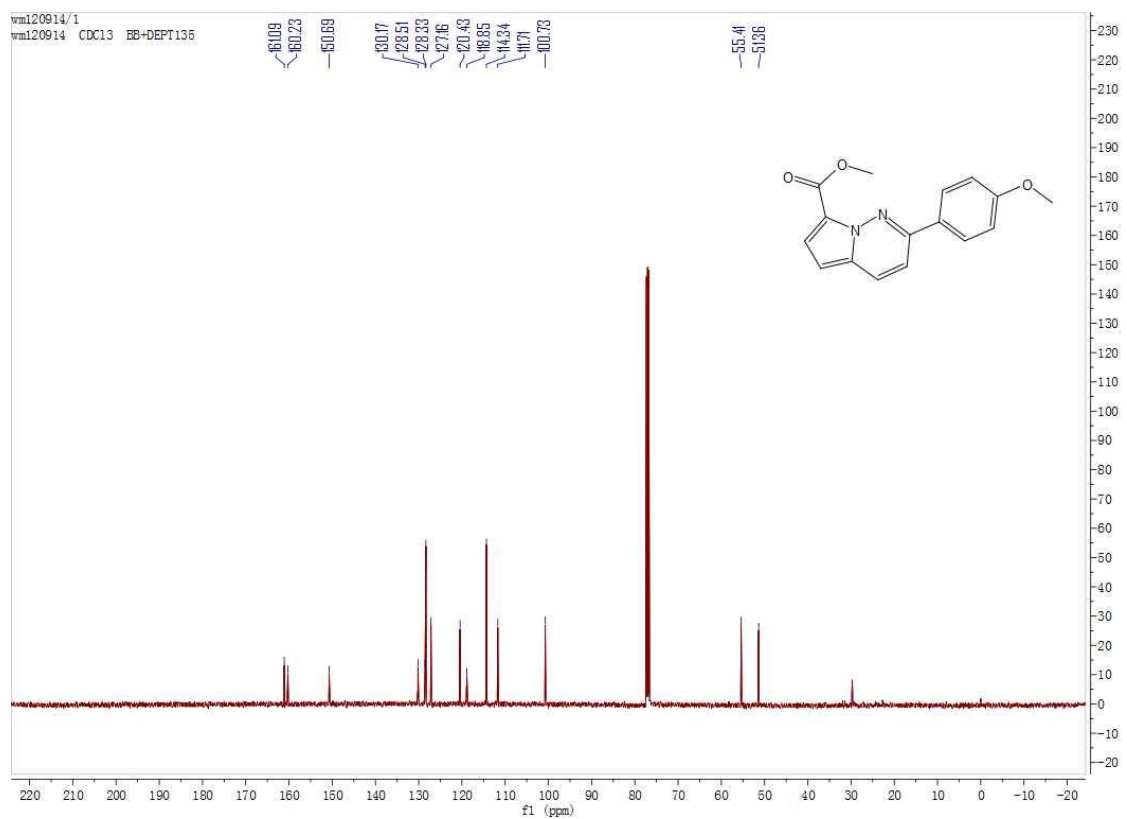

## Compound 3d

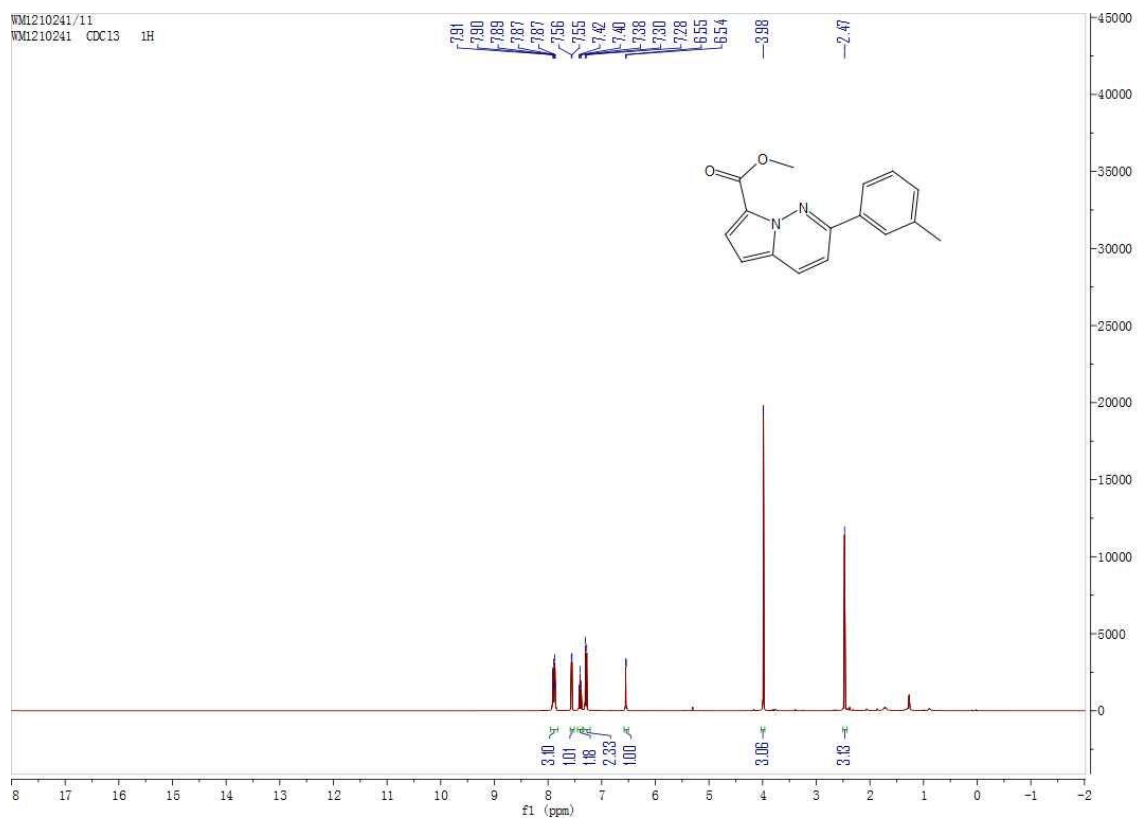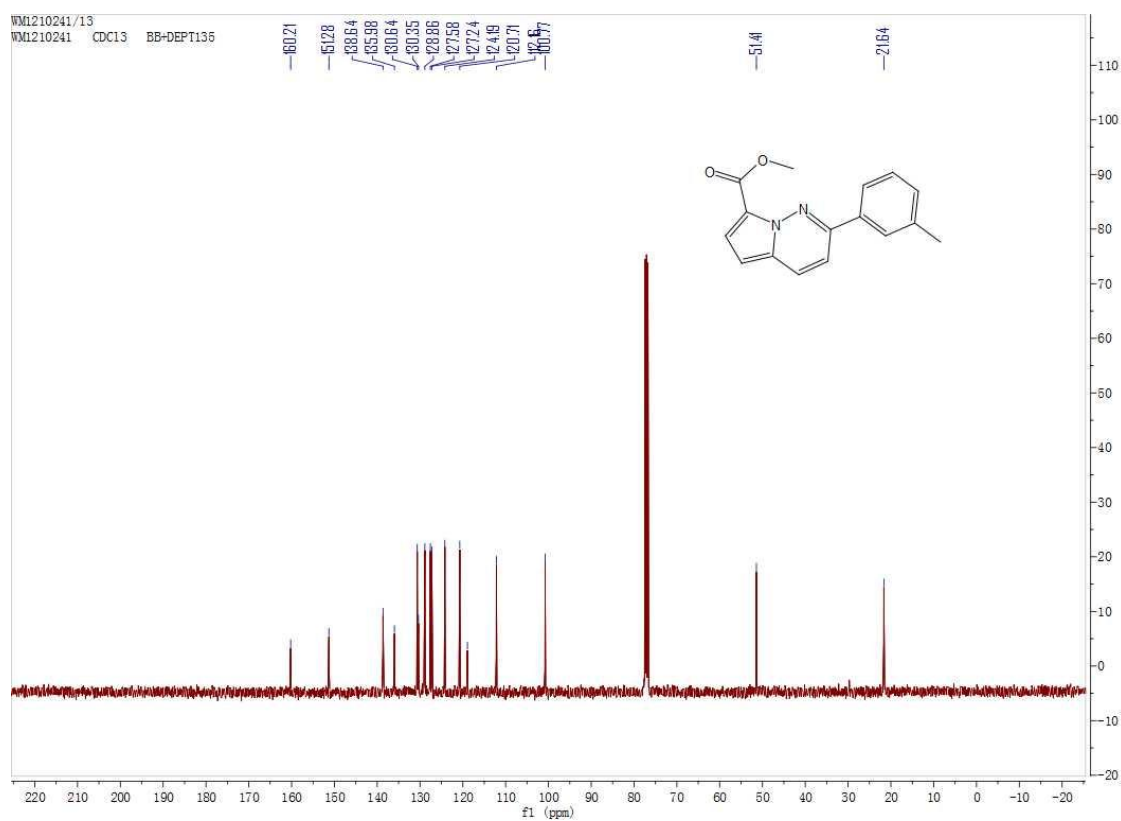

### Compound 3e

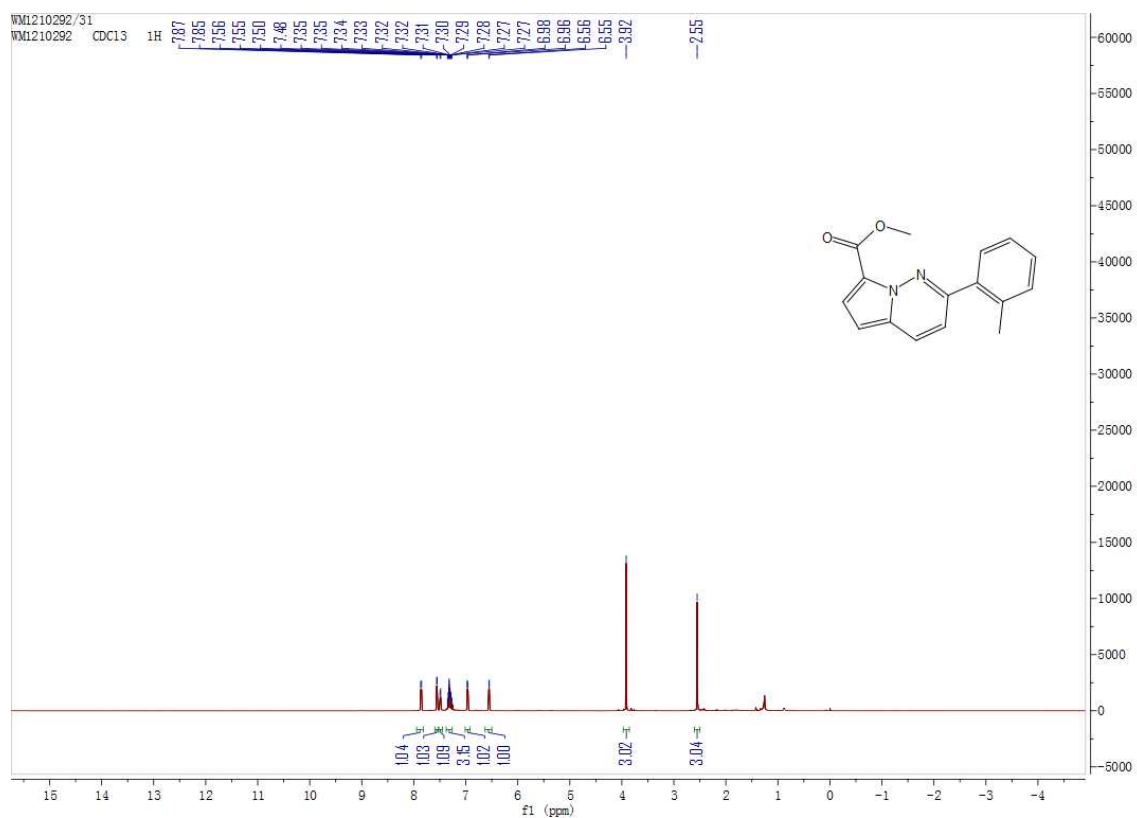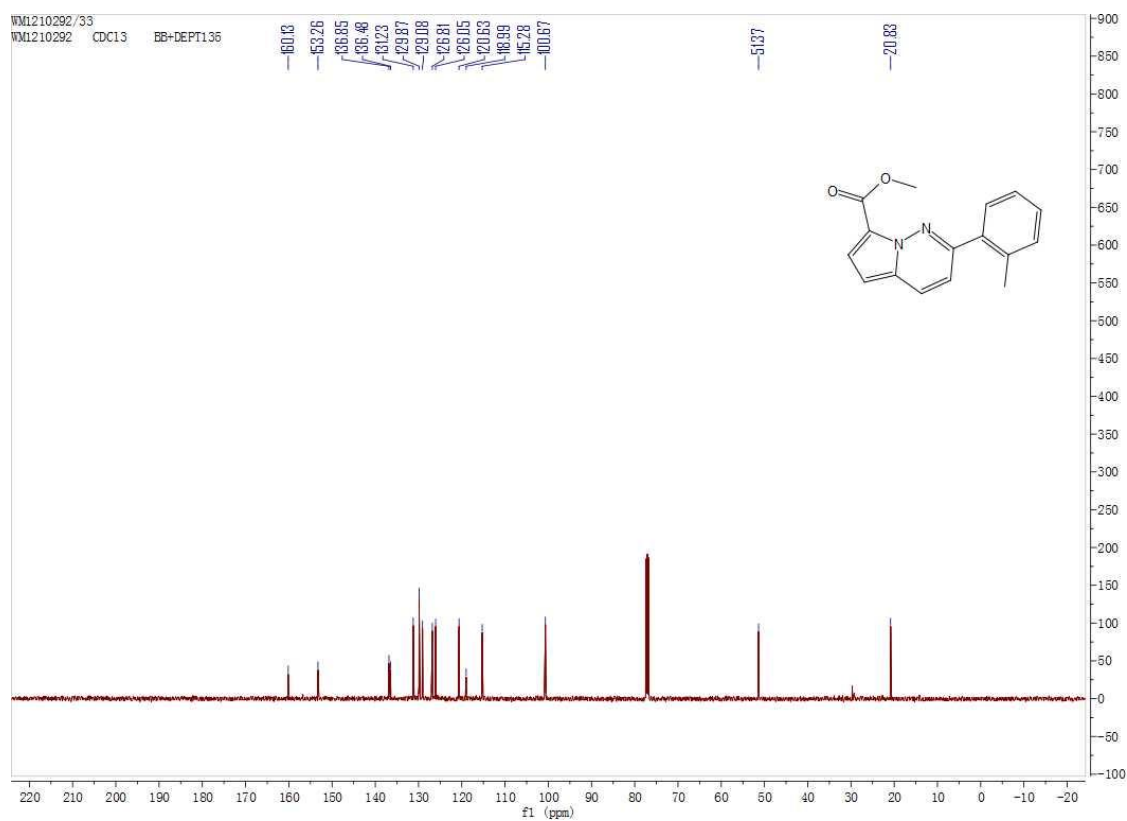



## Compound 3f

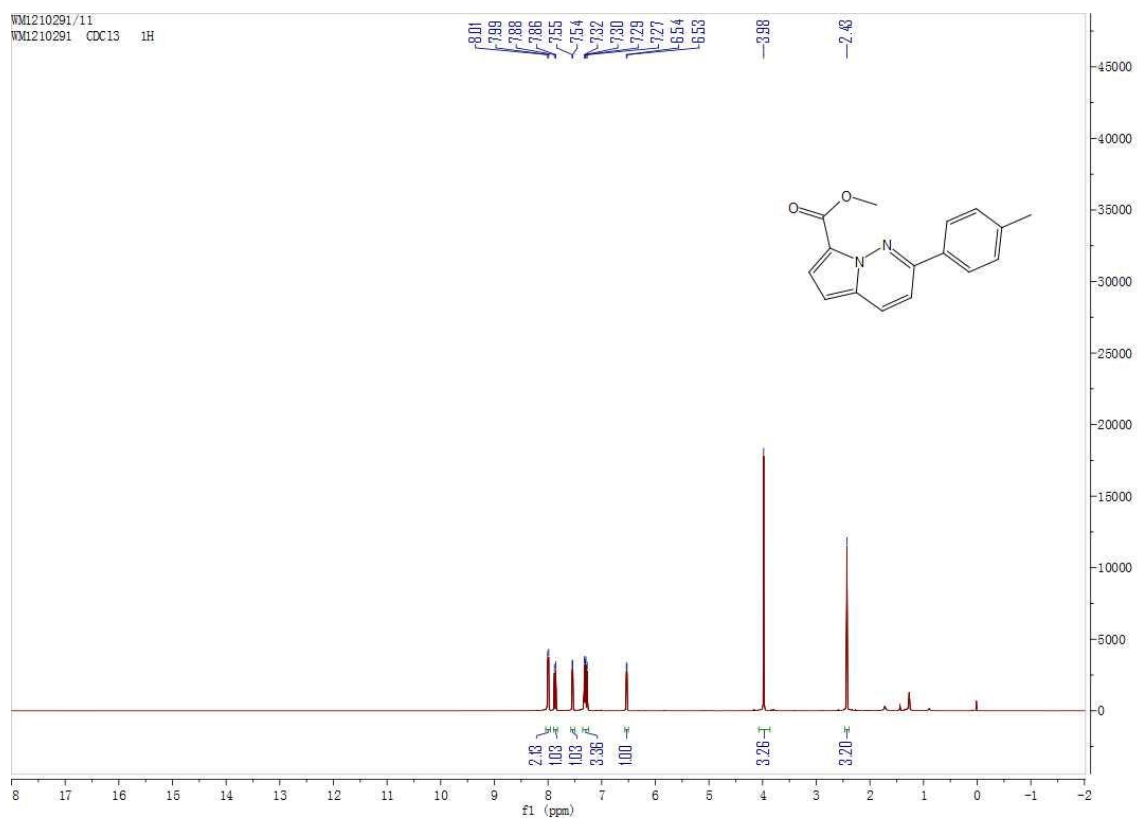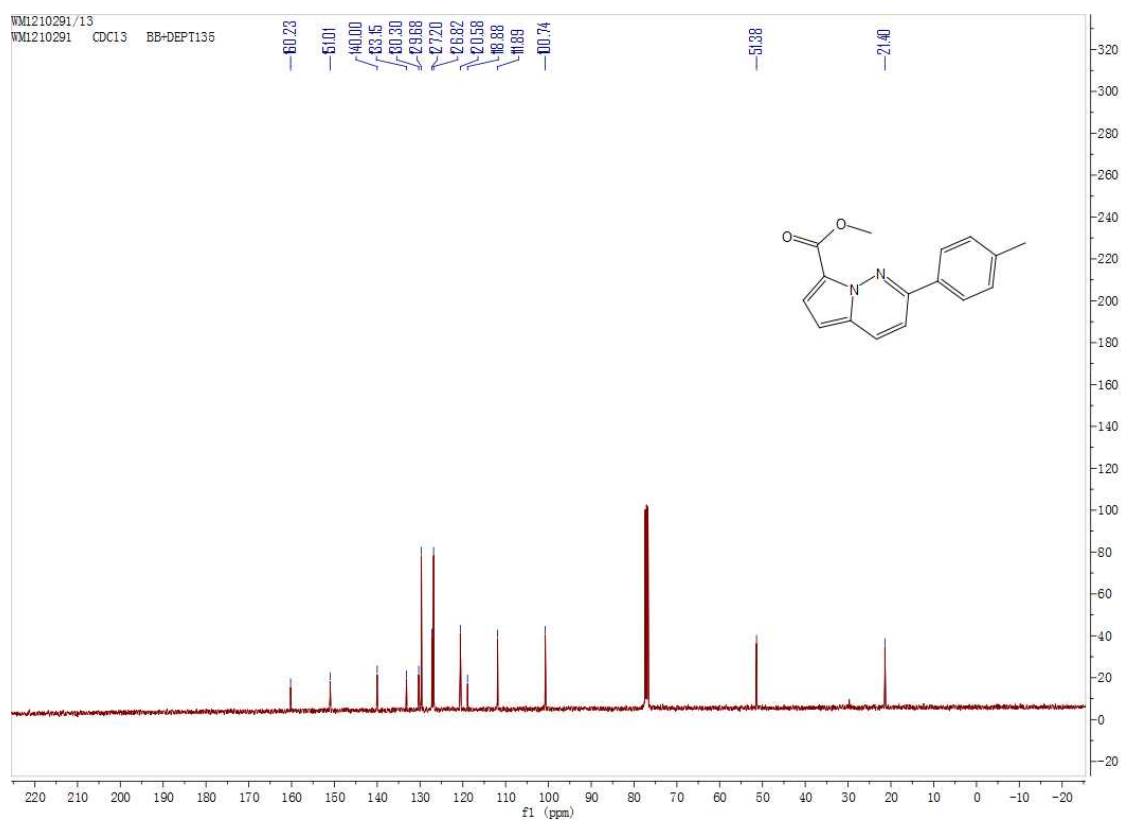

### Compound 3g

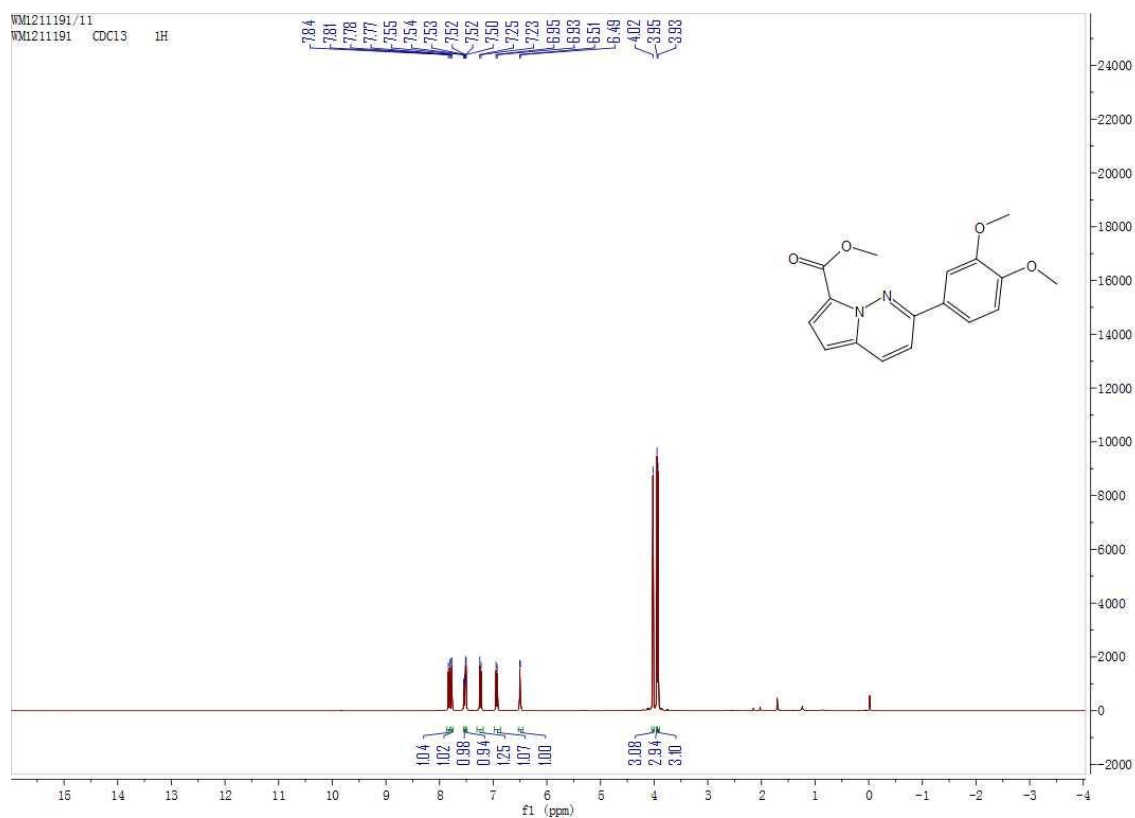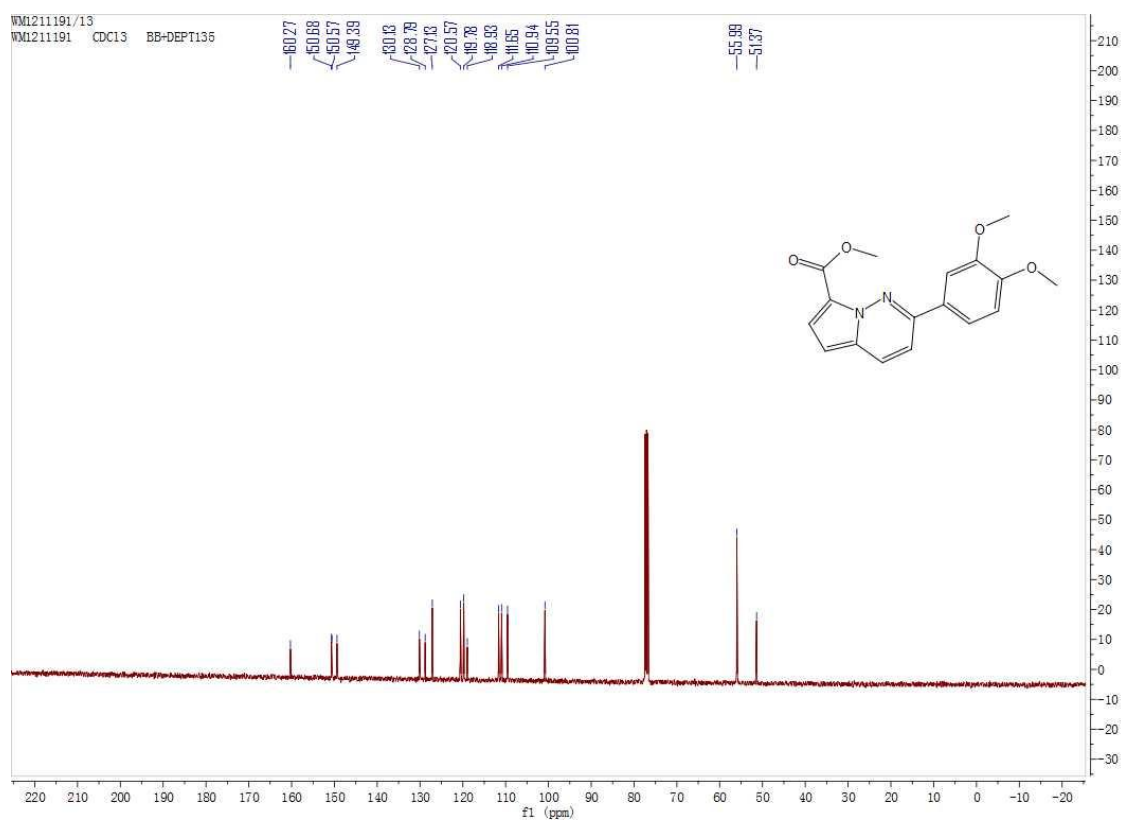

## Compound 3h

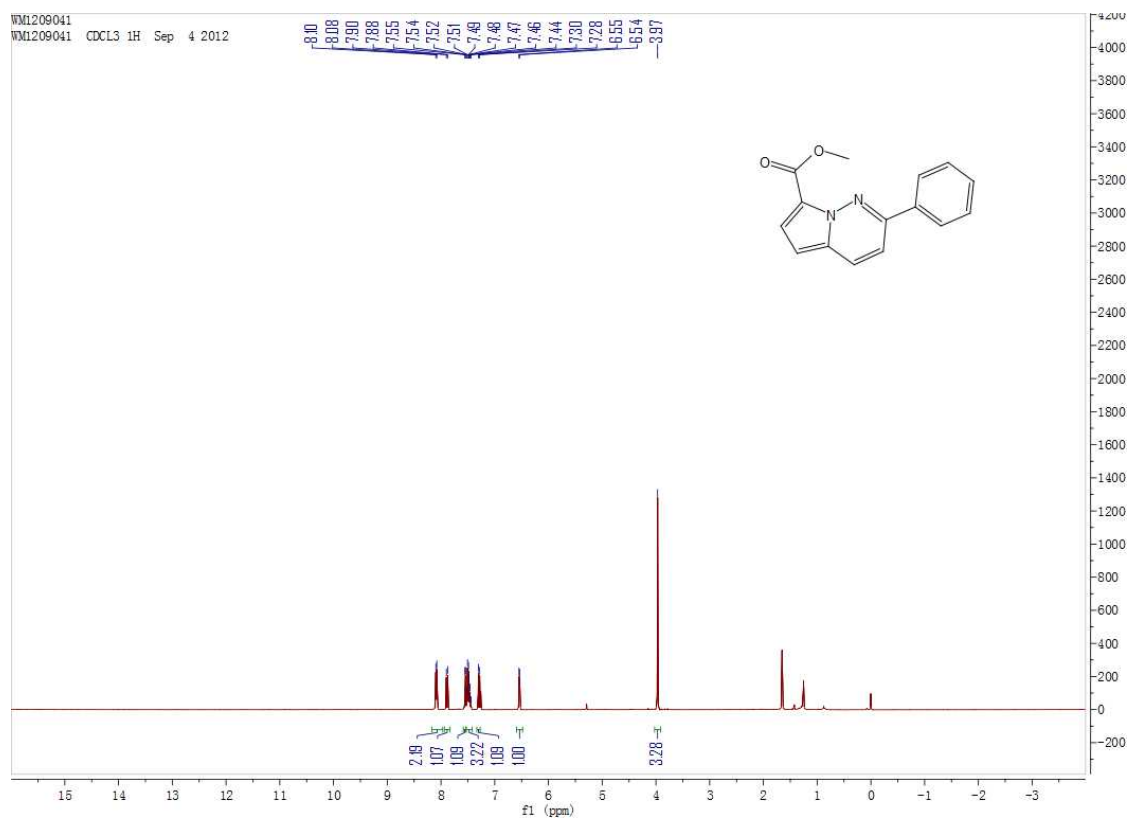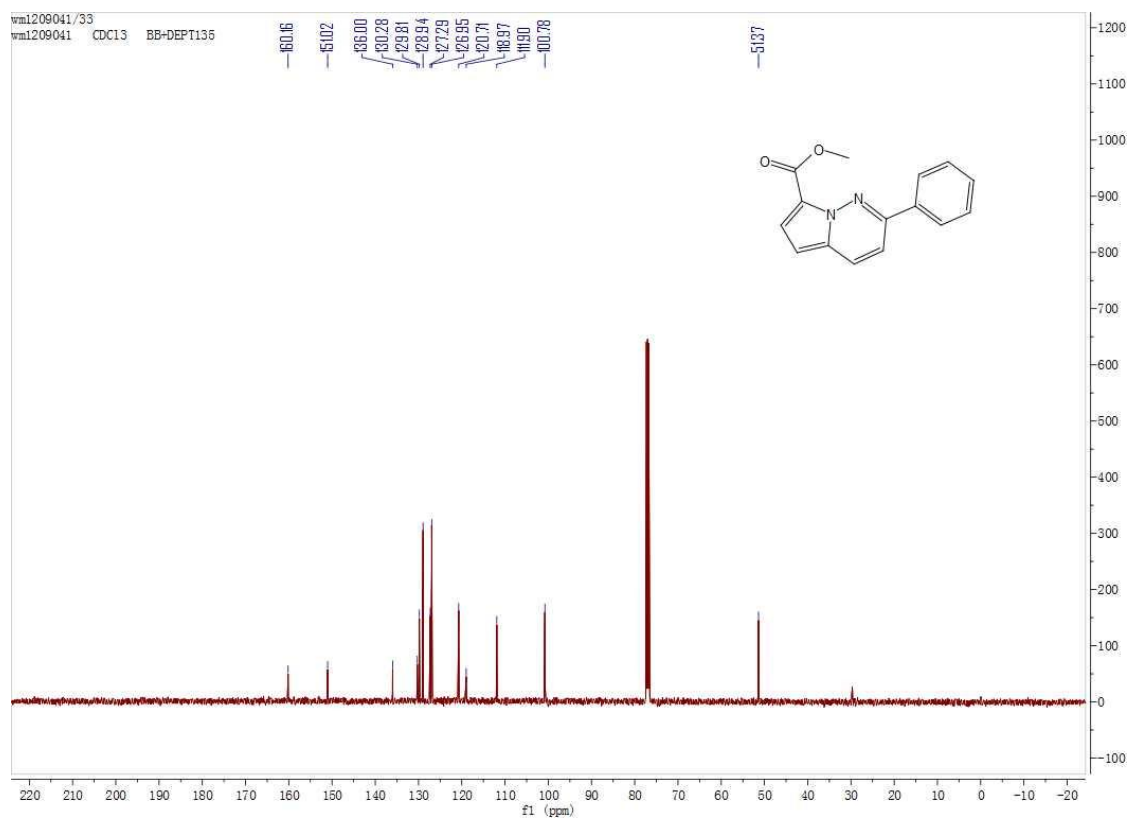

### Compound 3i

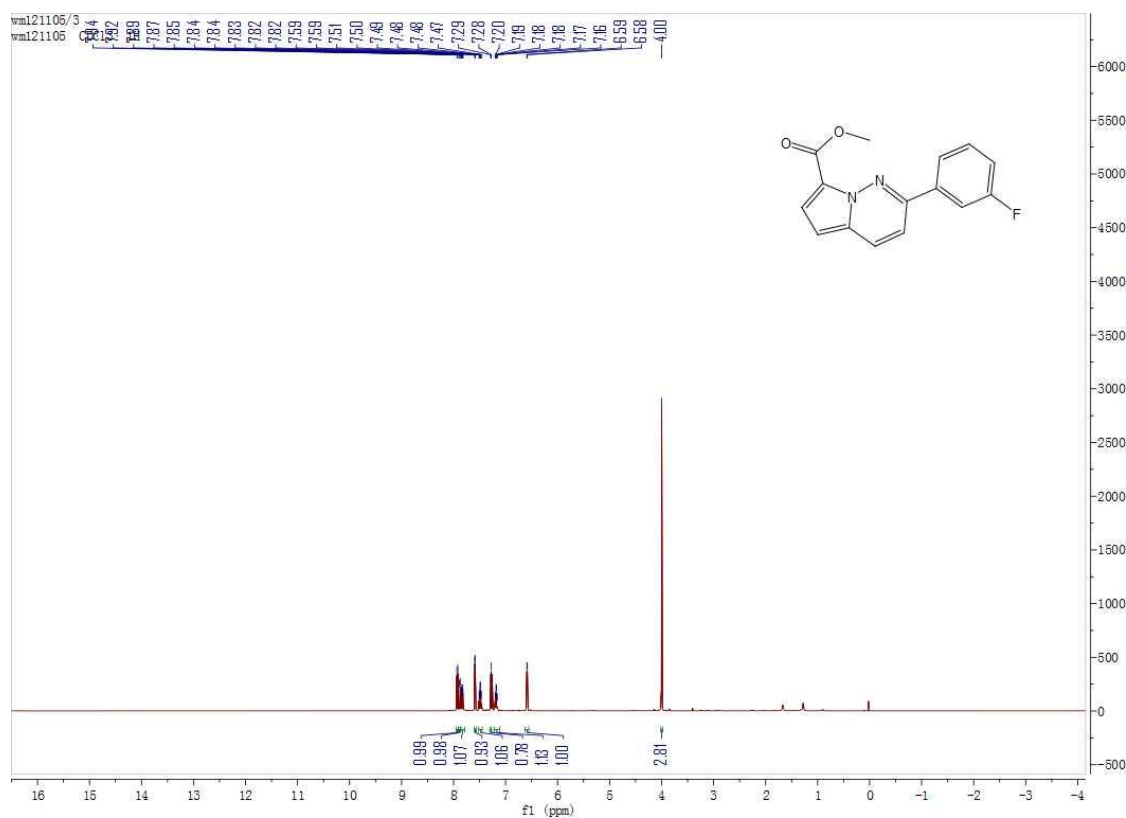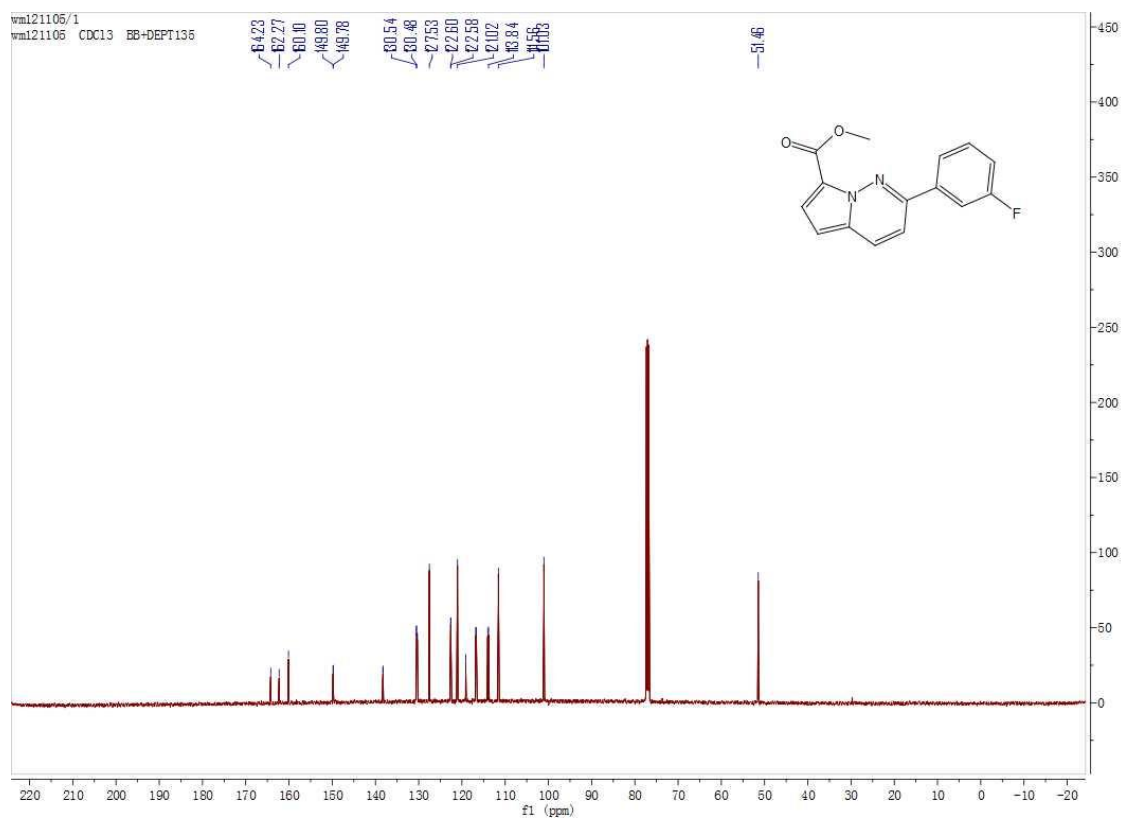

### Compound 3j

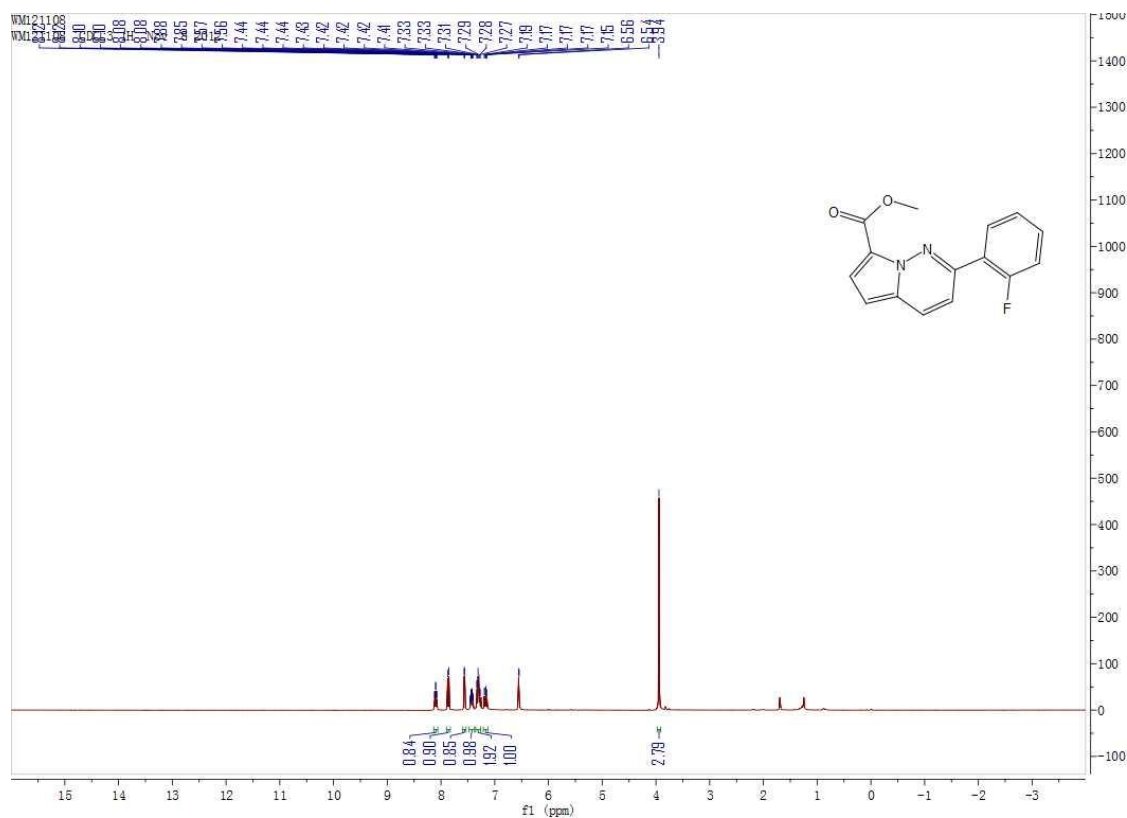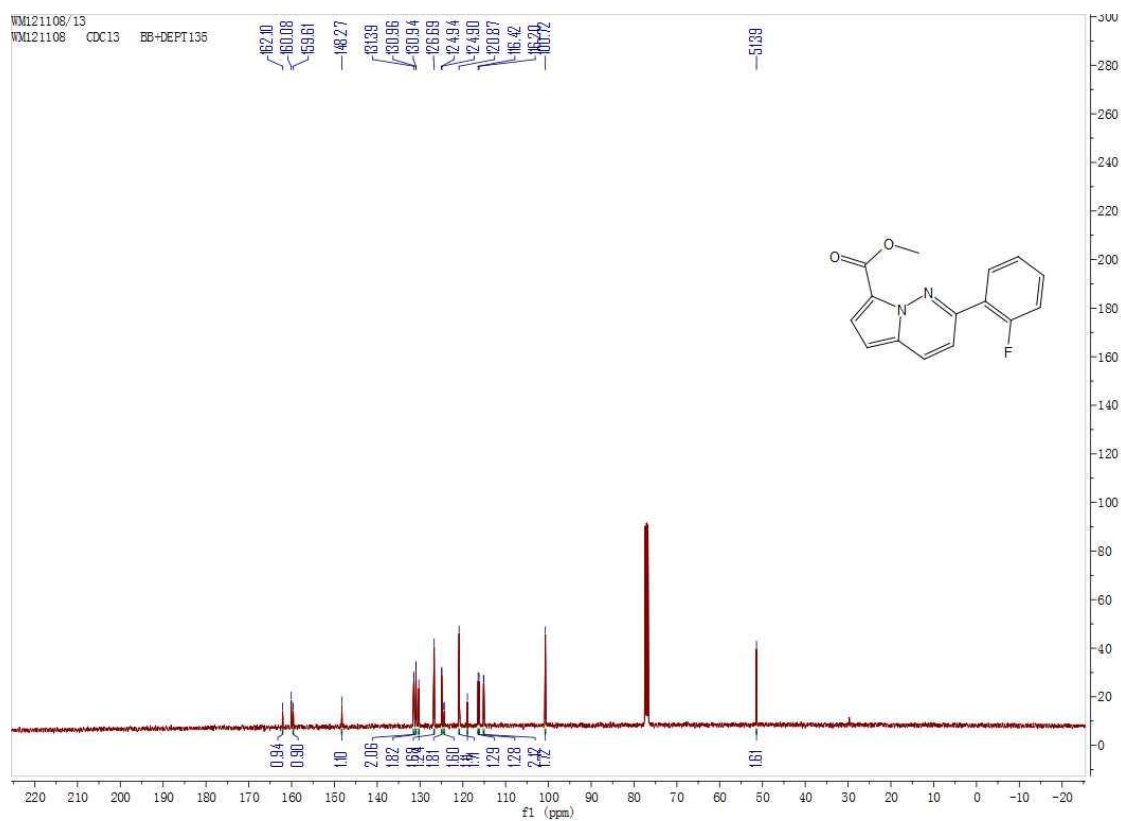

### Compound 3k

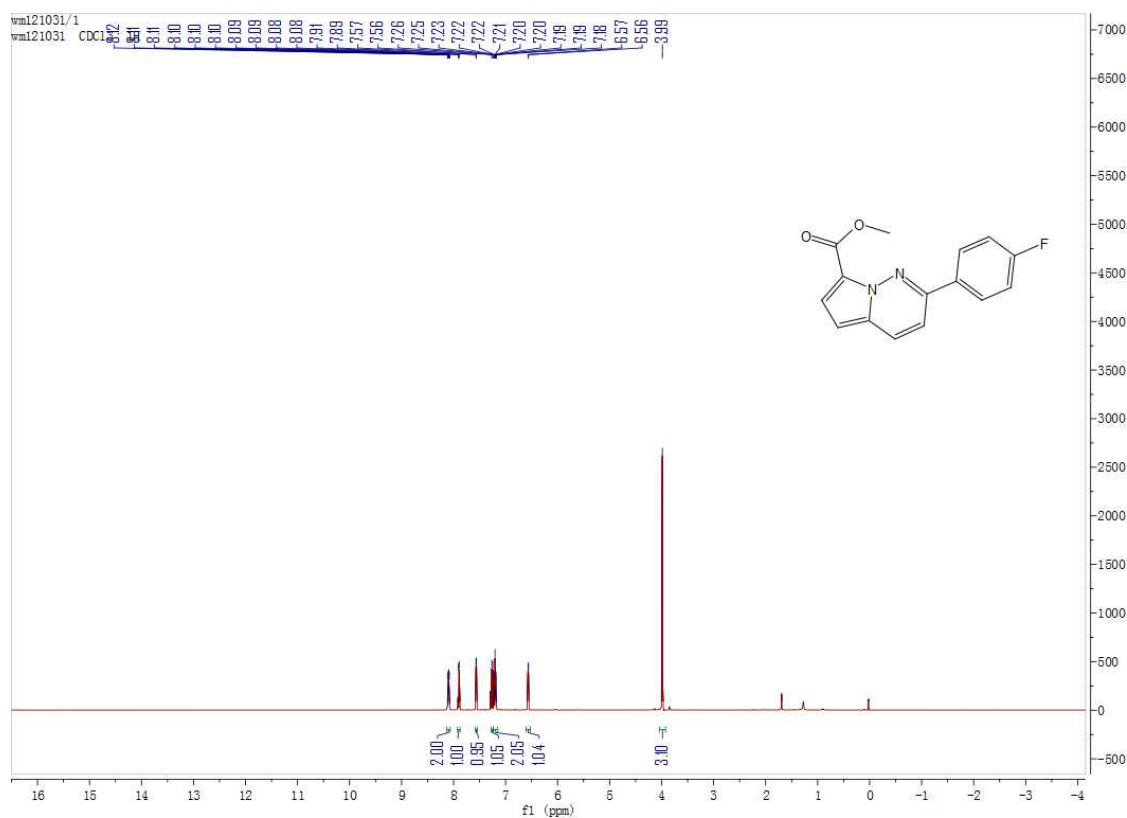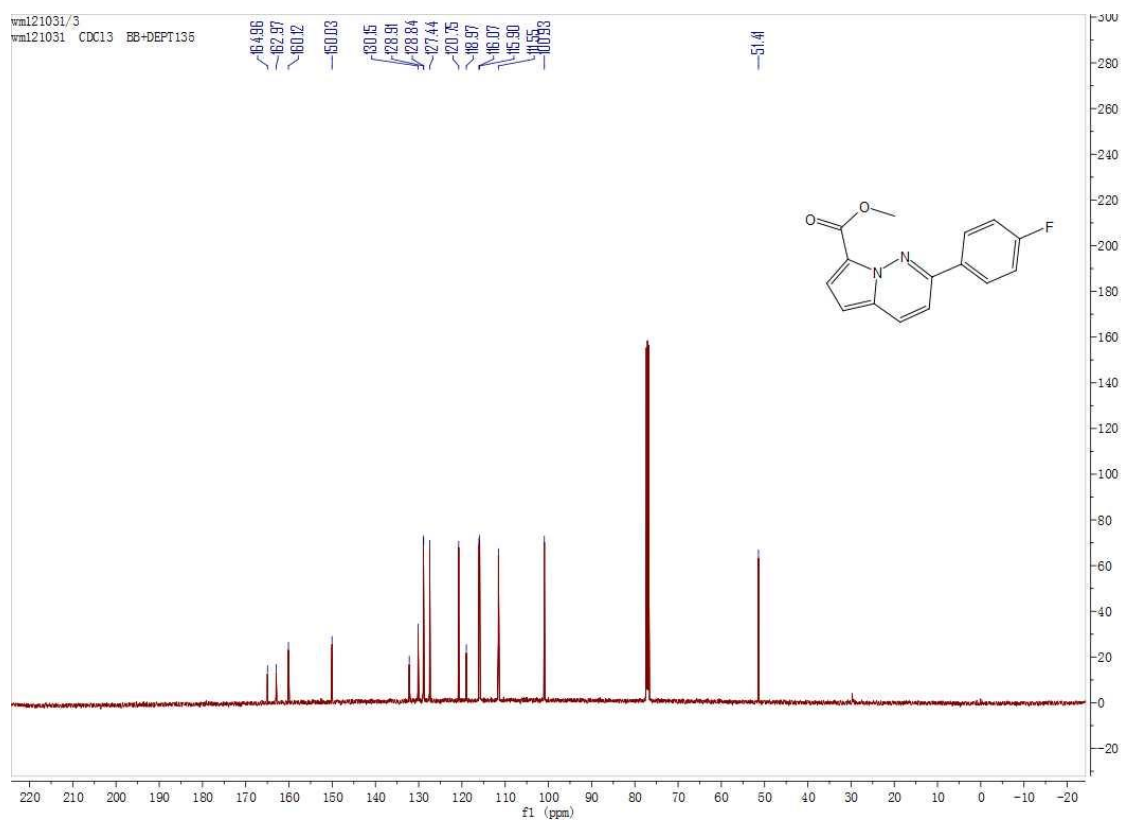

## Compound 3l

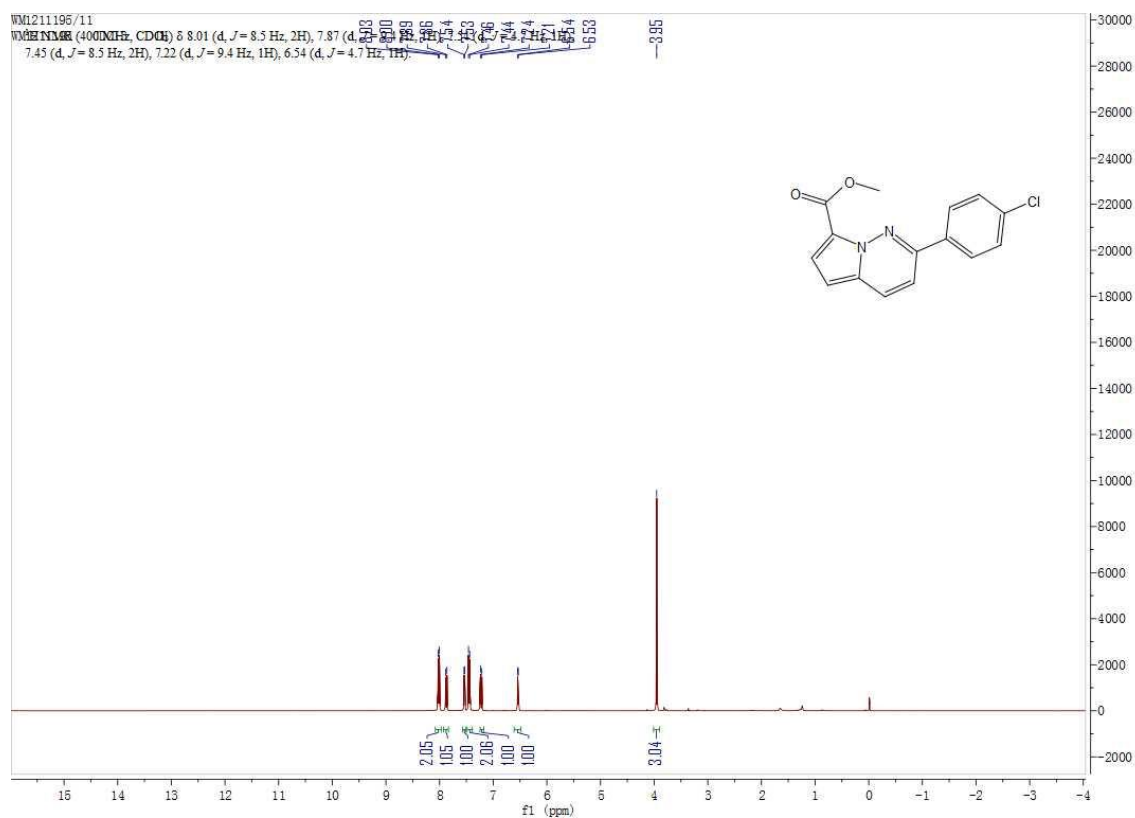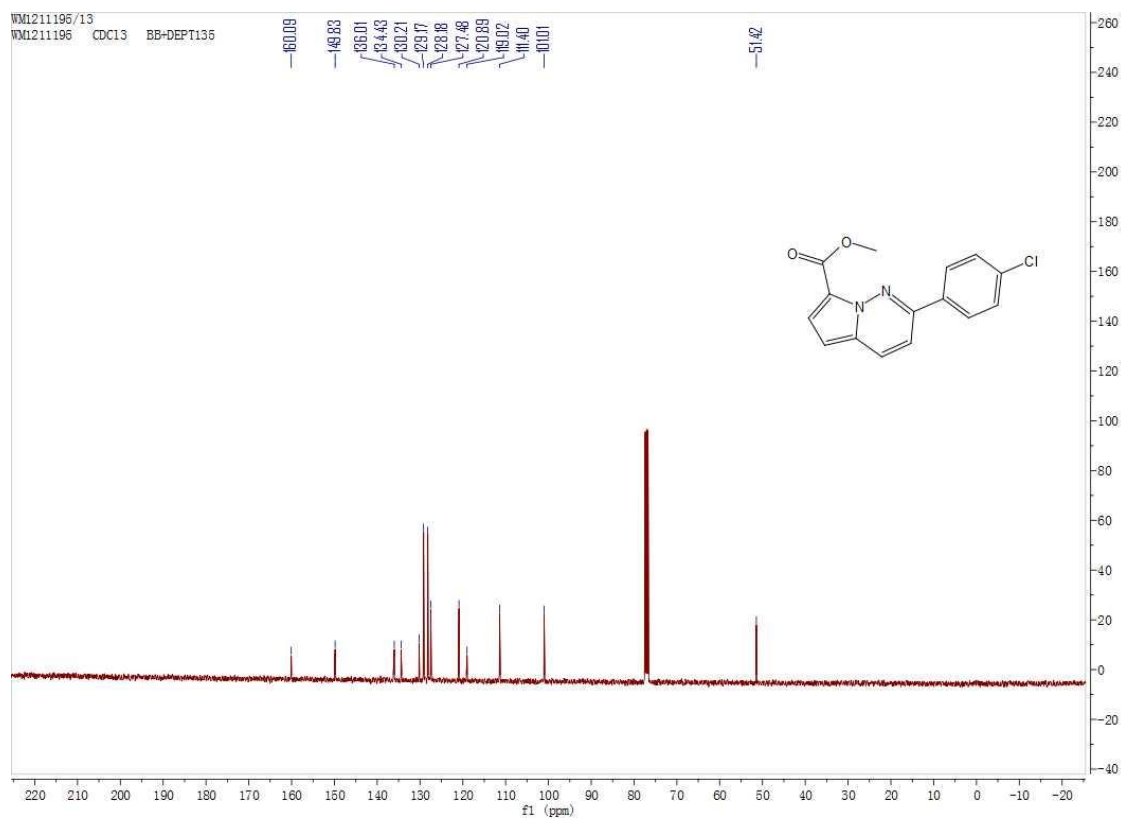

### Compound 3m

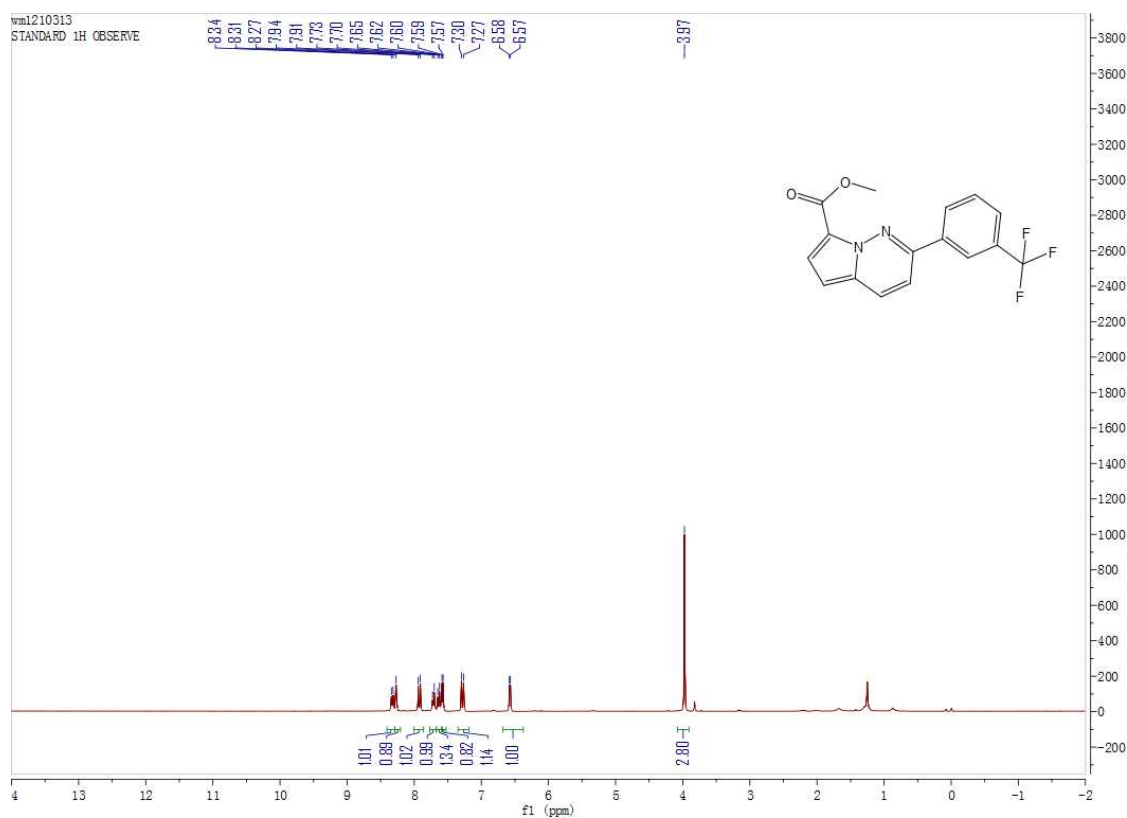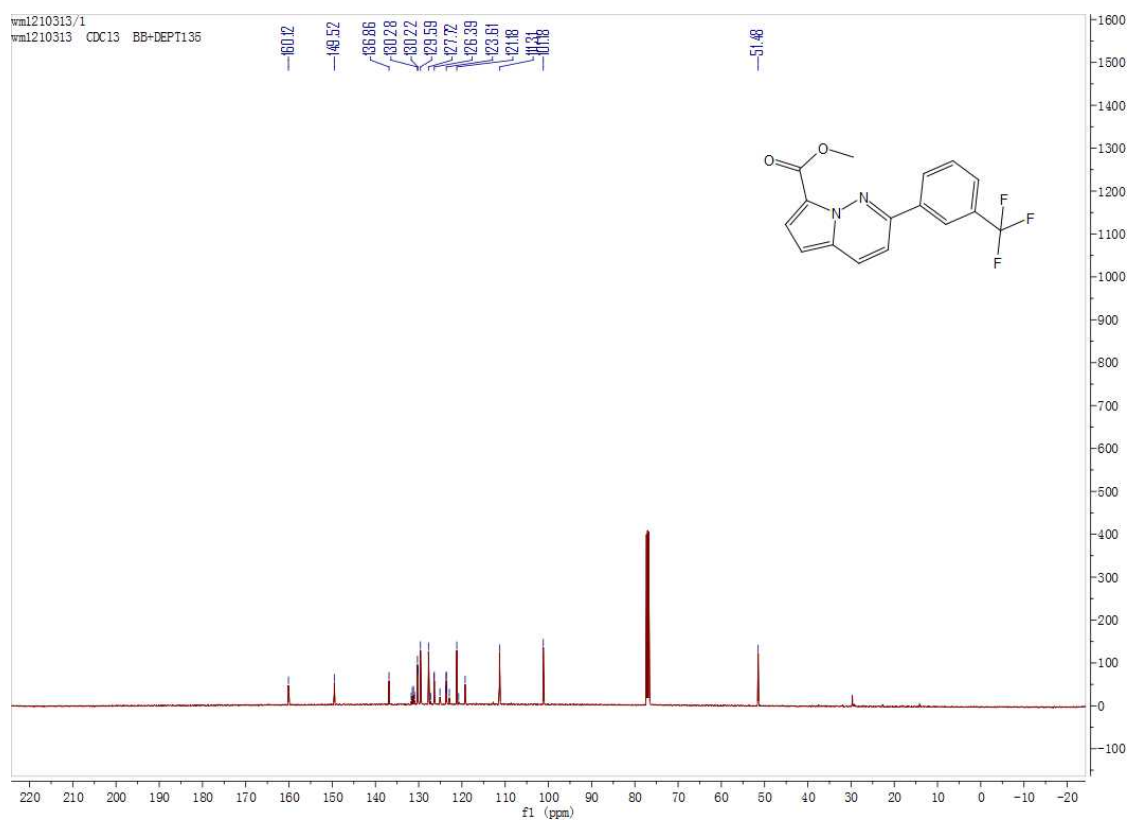



### Compound 3n

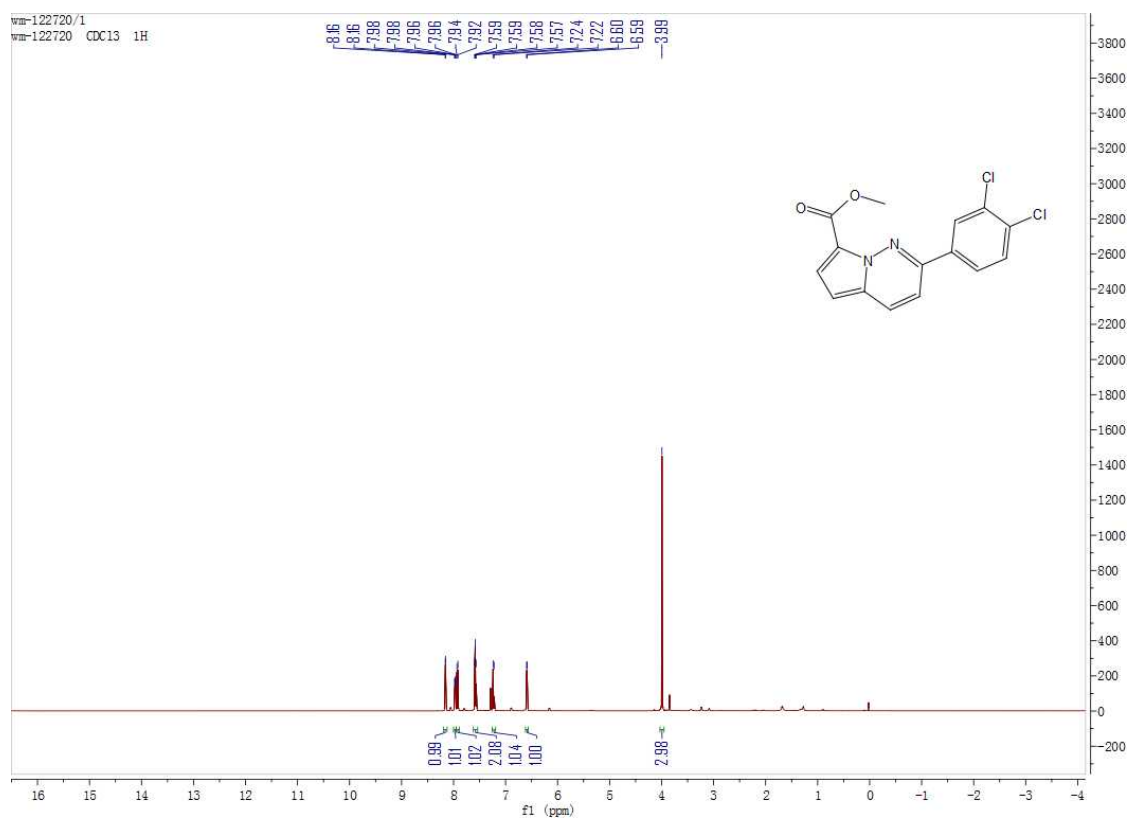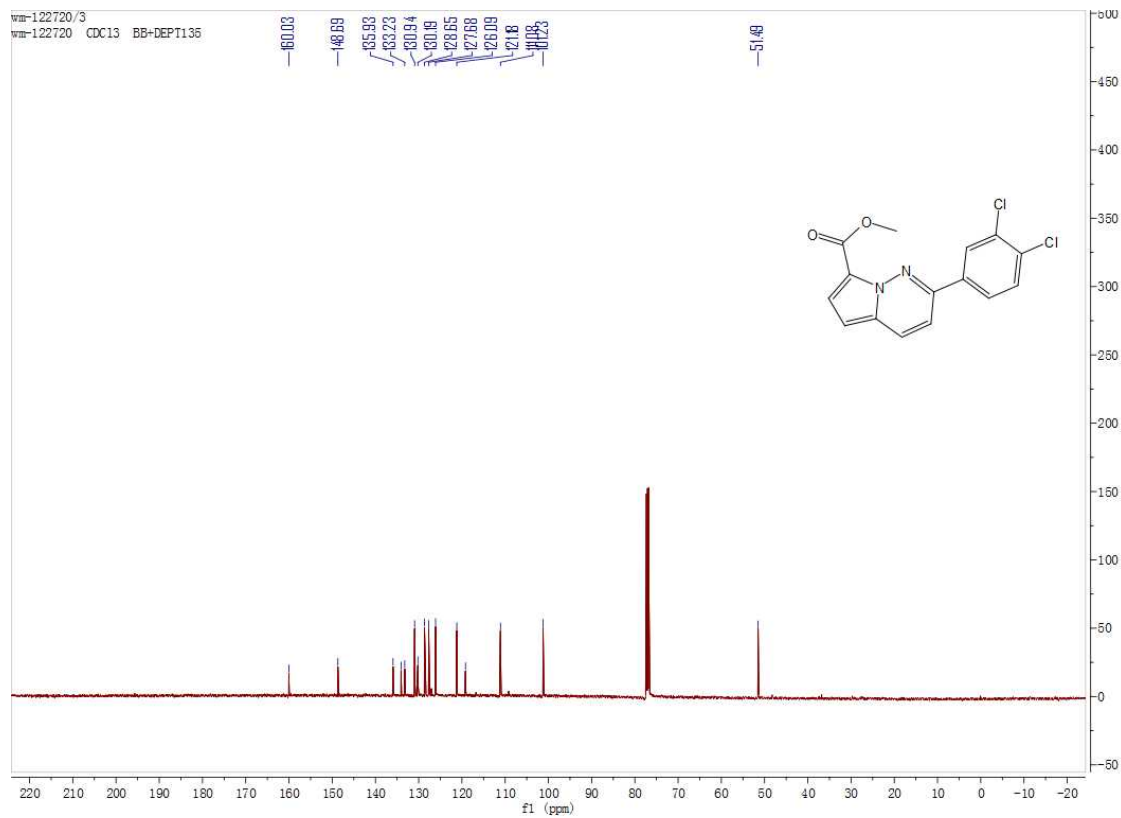

## Compound 3o

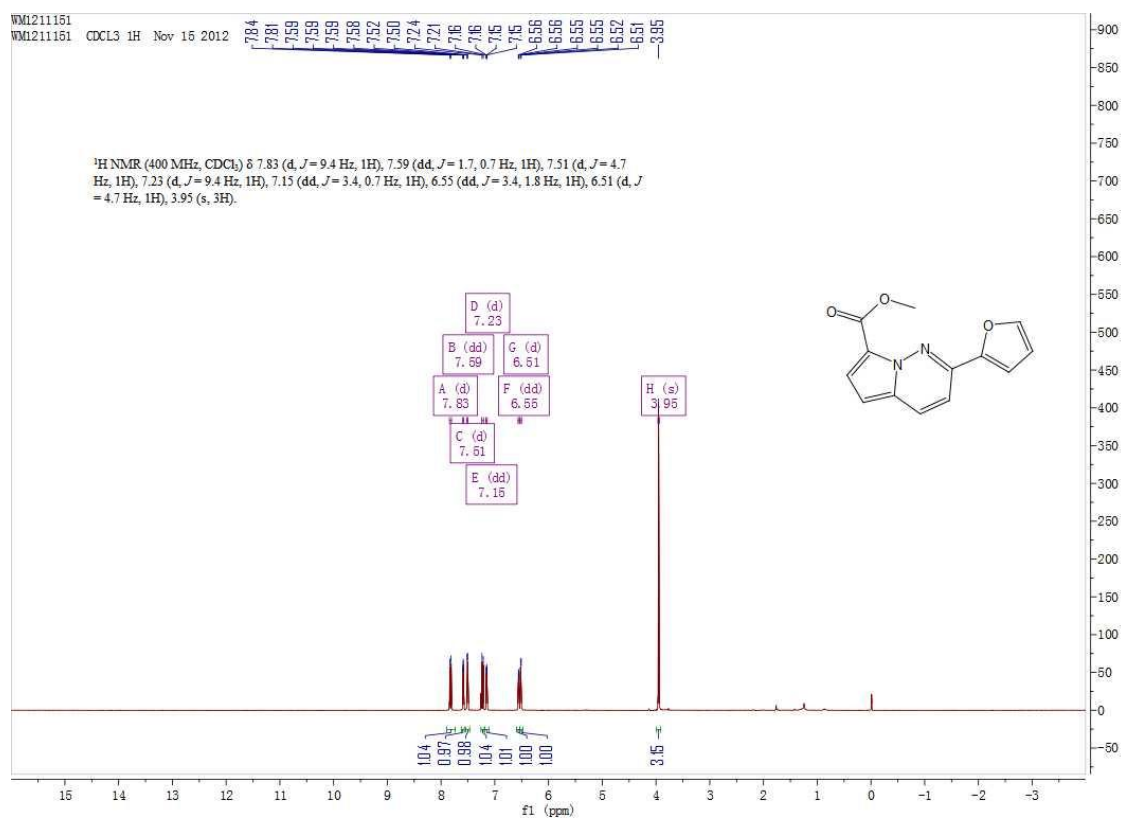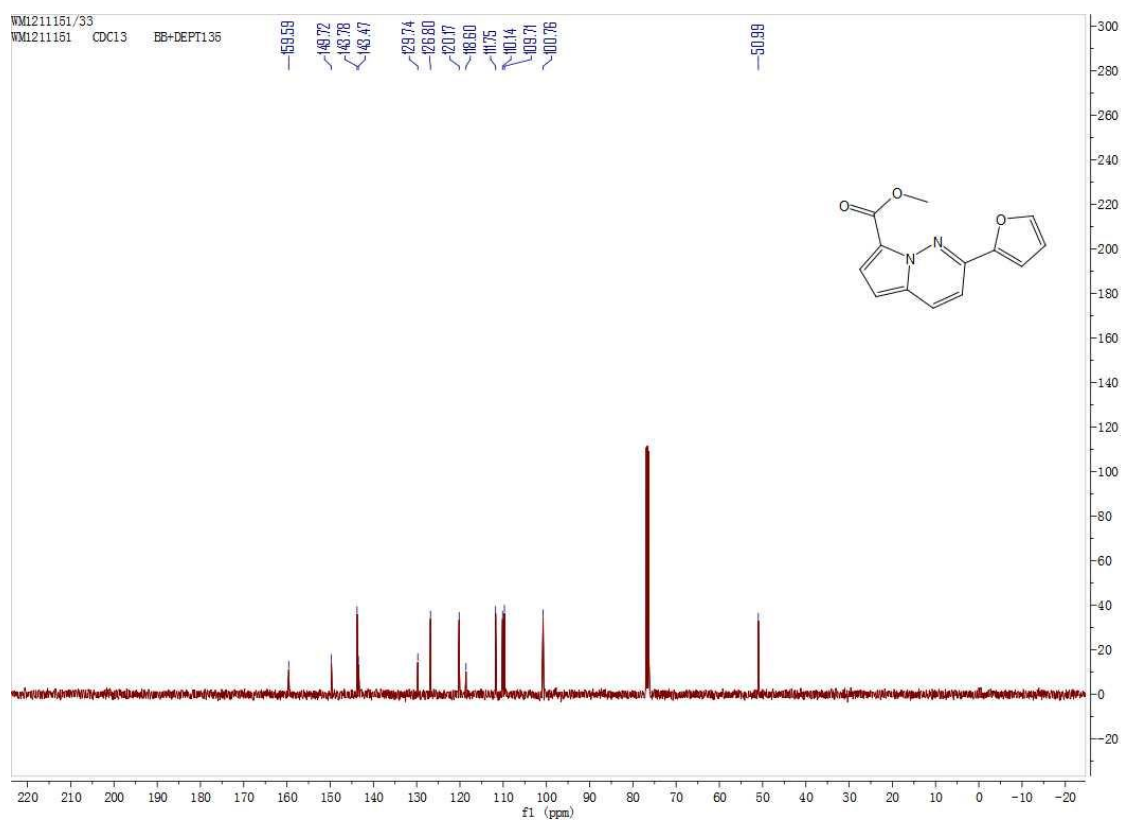

### Compound 3p

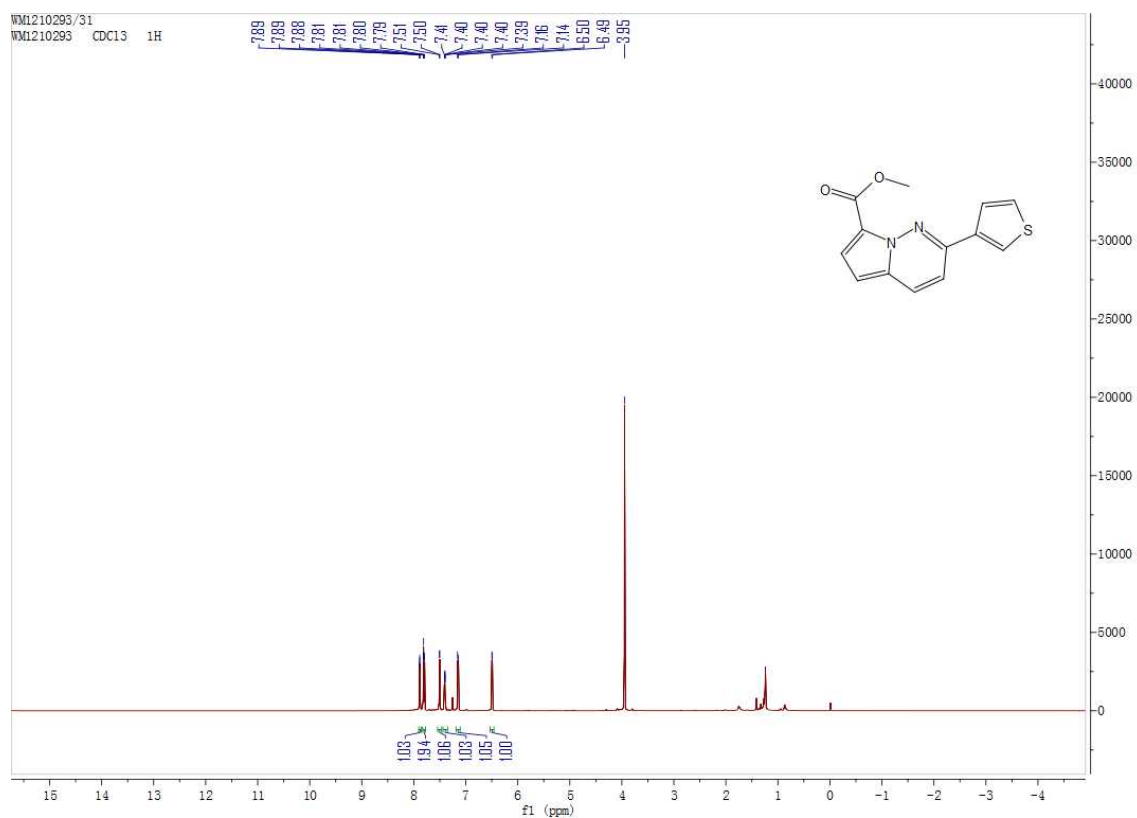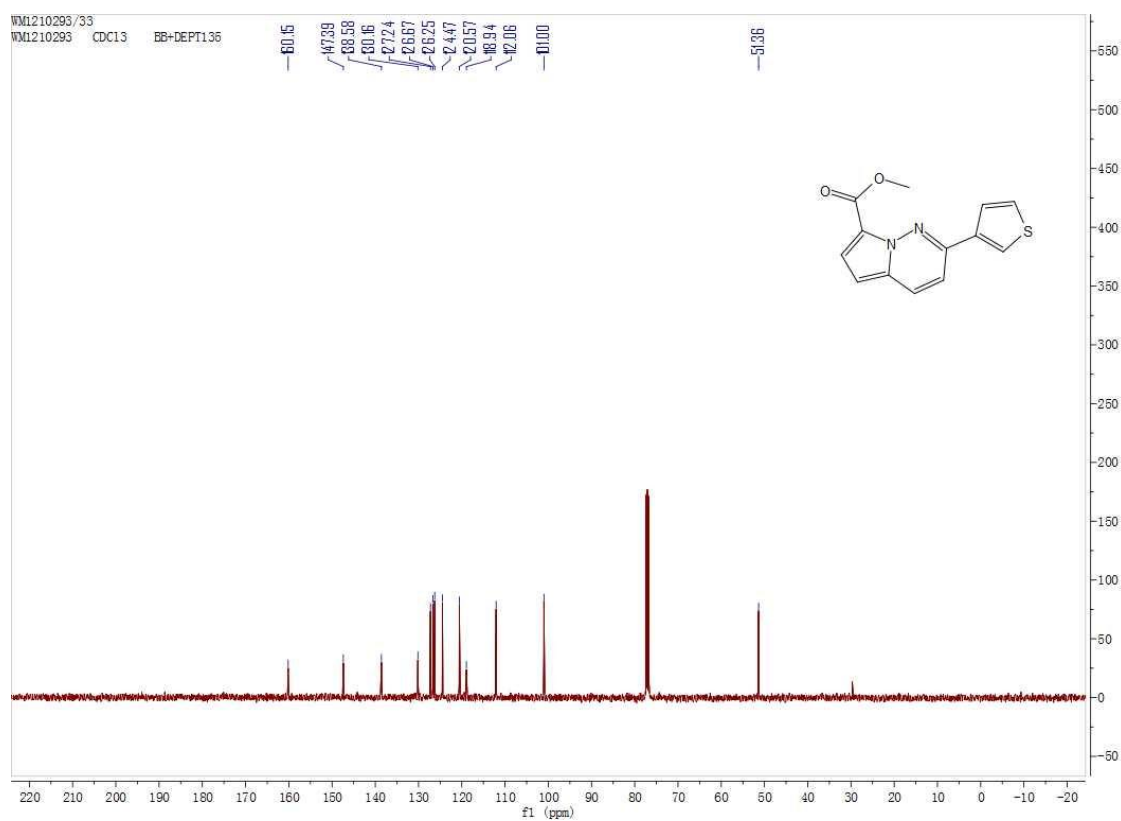

### Compound 3q

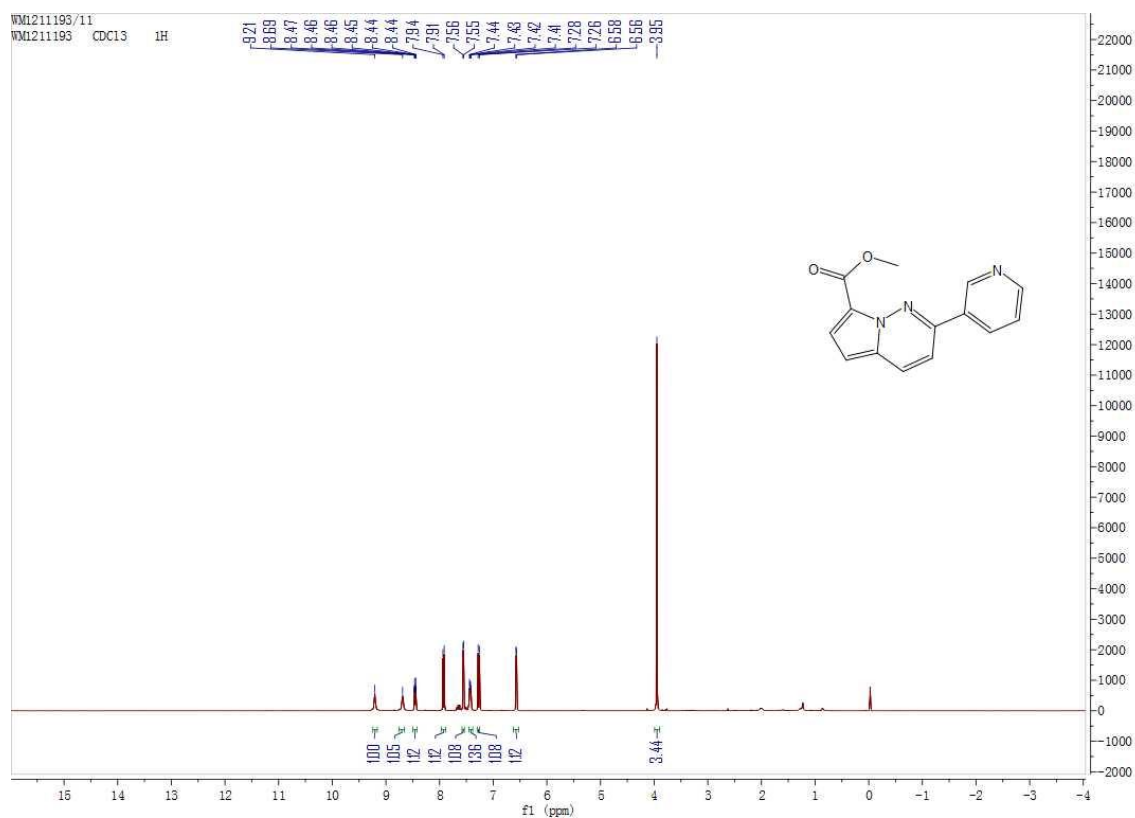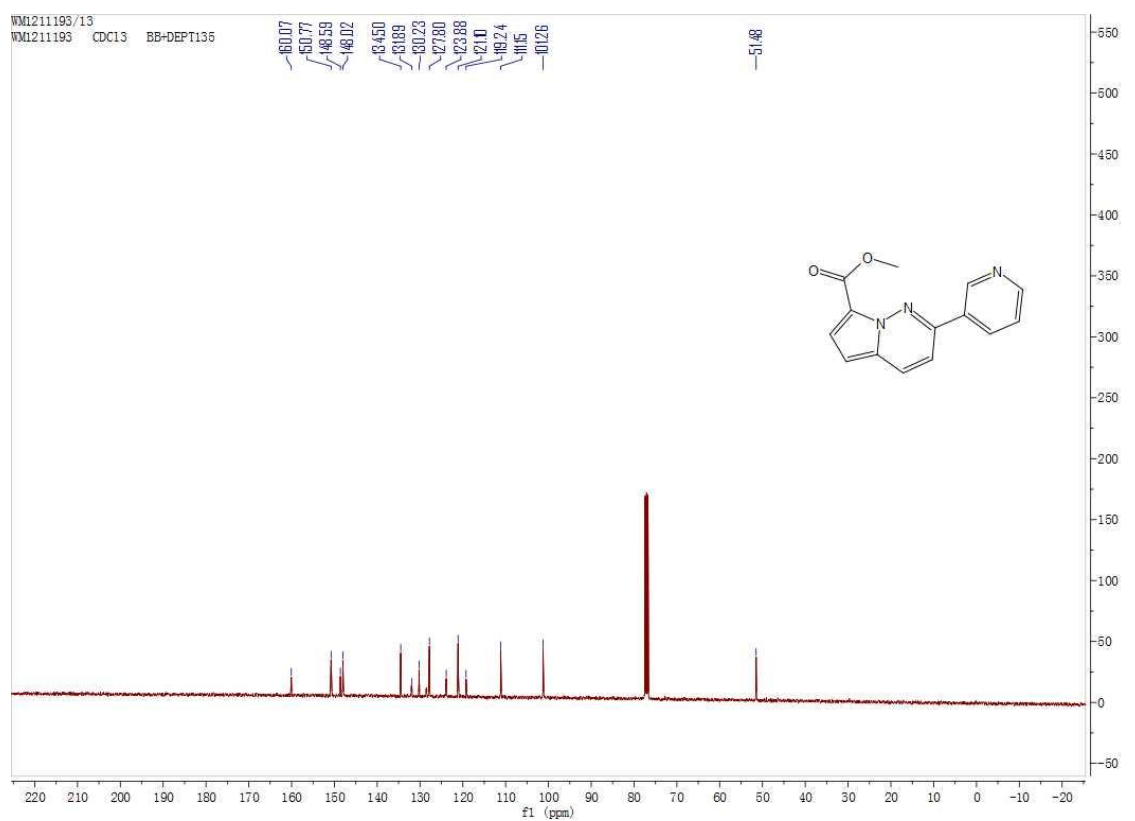

### Compound 3r

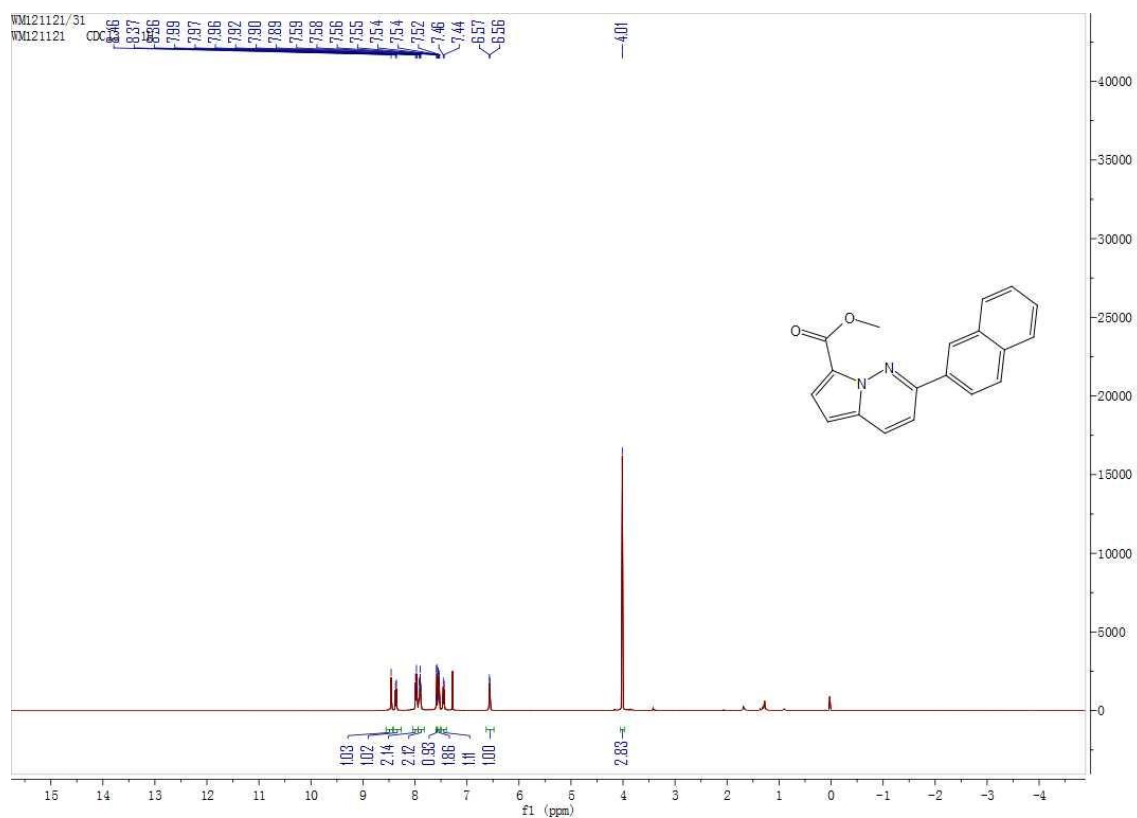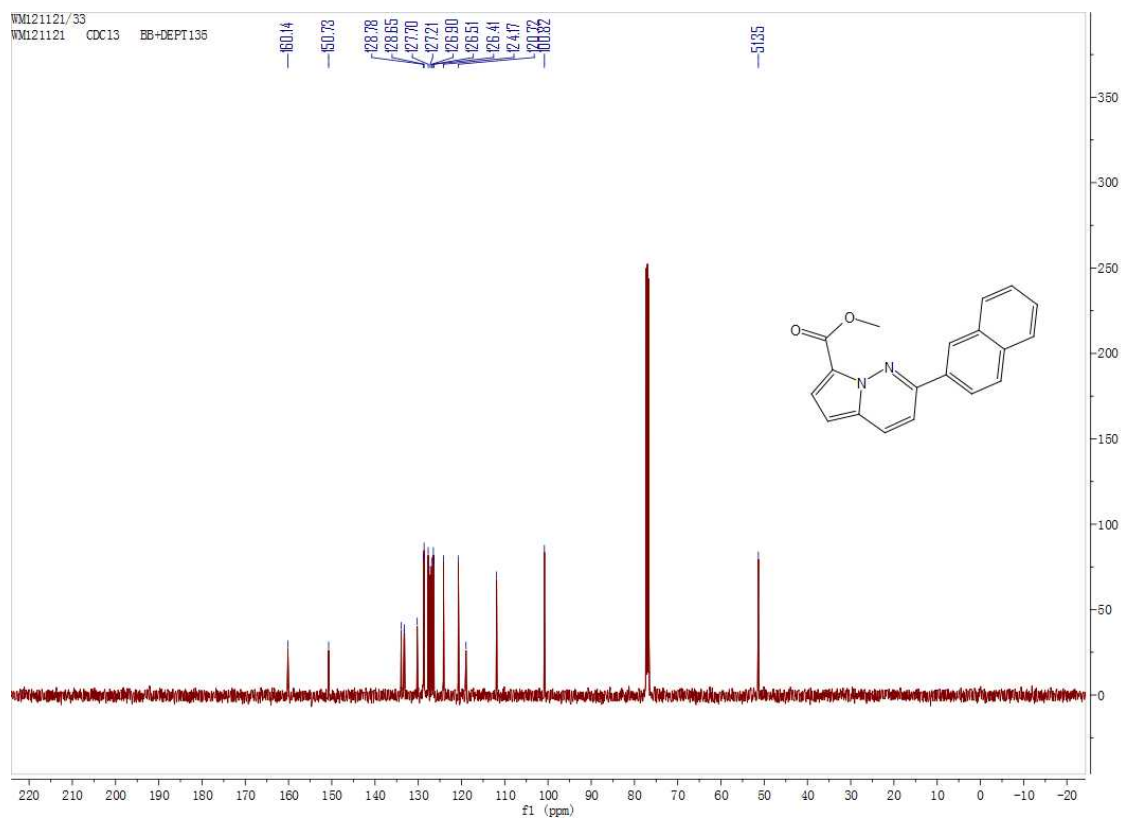

### Compound 3s

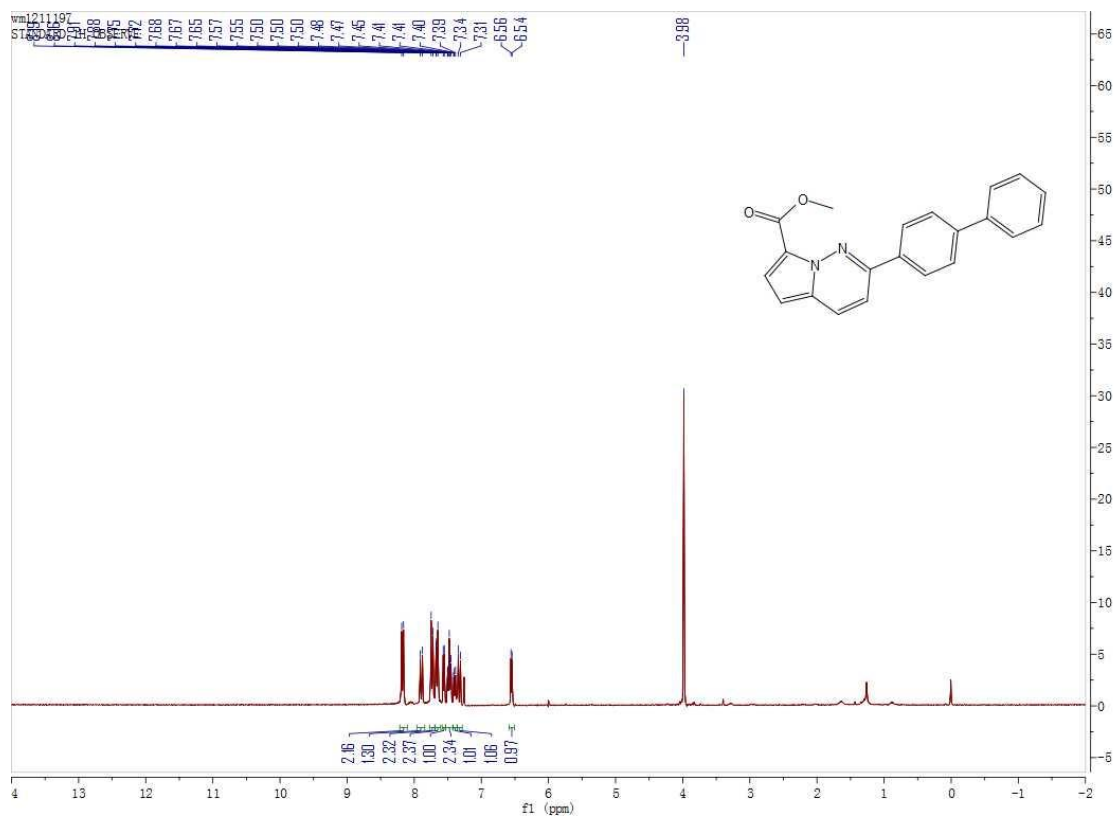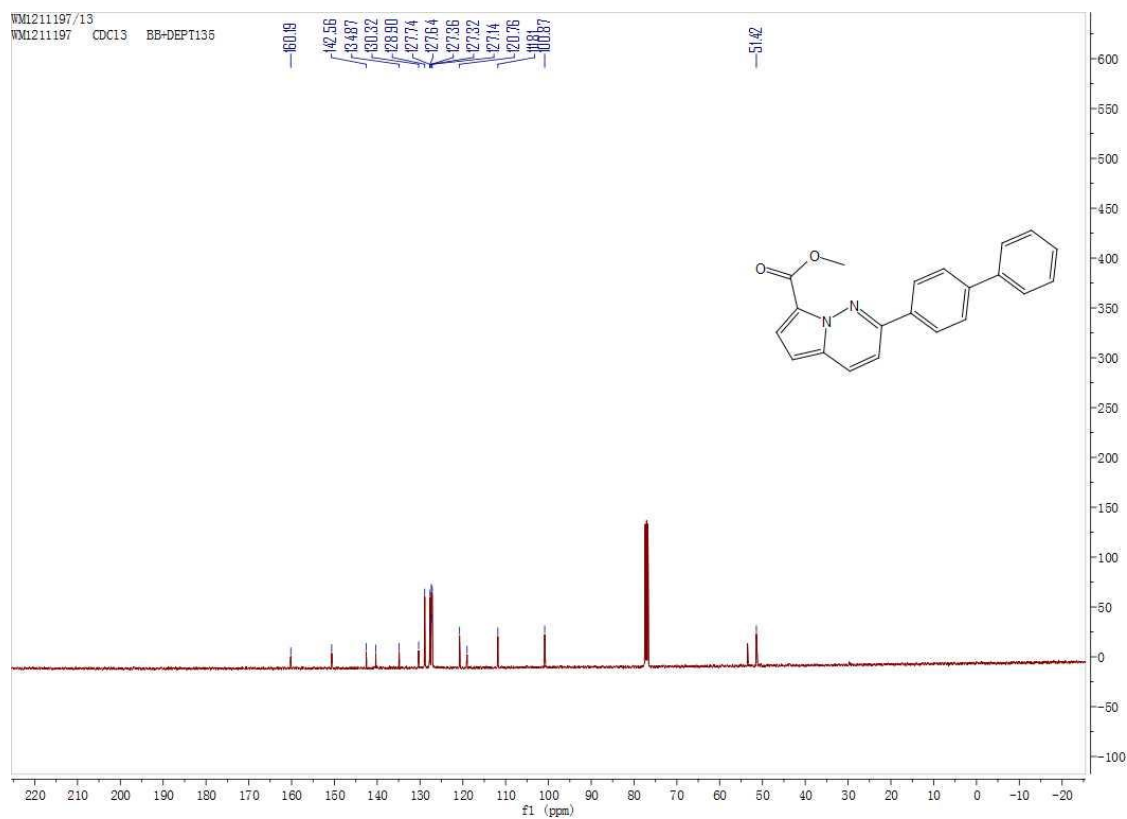

### Compound 3t

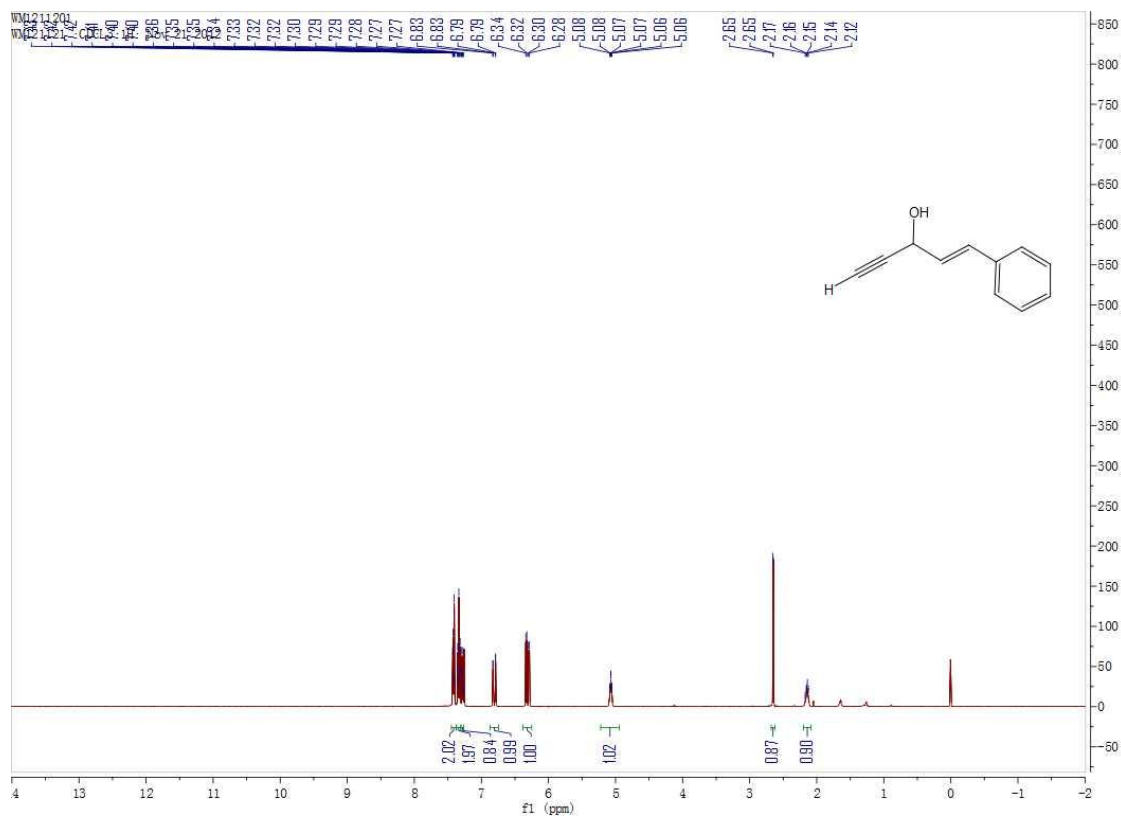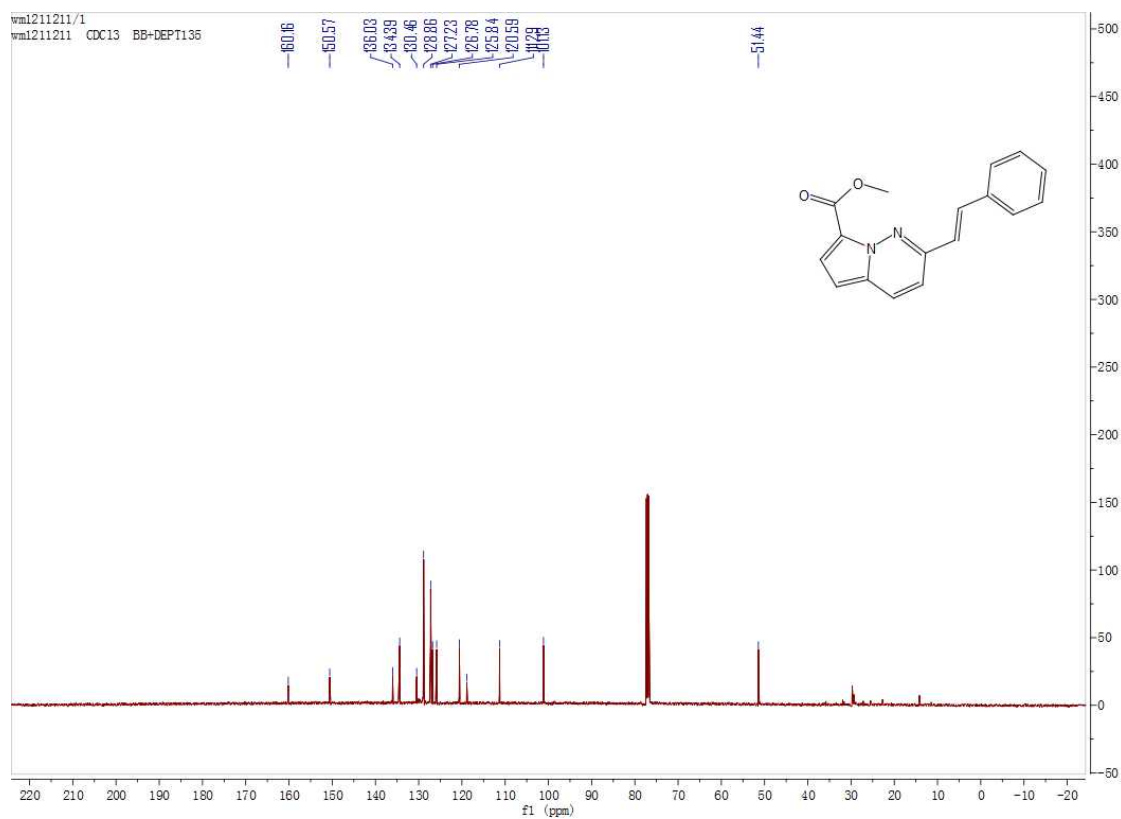

Supplement: c3ob40157j.pdf [file c3ob40157j.pdf]
